# Supplementary material for: Flexible organic crystals. Understanding the tractable co-existence of elastic and plastic bending
Source: Royal Society of Chemistry journal article supplement (doi:10.1039/d2sc02969c), 2022-01-01
Supplement: d2sc02969c5.pdf [file d2sc02969c5.pdf]

# Flexible organic crystals. Understanding the tractable co-existence of elastic and plastic bending

Indira S. Divya, Saravanan Kandasamy, Shodai Hasebe, Toshiyuki Sasaki,  
Hideko Koshima,\* Krzysztof Woźniak\* and Sunil Varughese\*

## Supporting Information

| <b>Contents</b>      |                                                              | <b>Page No.</b> |
|----------------------|--------------------------------------------------------------|-----------------|
| Experimental details |                                                              | ESI 2-3         |
| <b>Tables</b>        |                                                              |                 |
| S1                   | Melting points of the crystals                               | ESI 4           |
| S2                   | Unit cell parameters of BZF                                  | ESI 4           |
| S3                   | Unit cell parameters of all the crystals                     | ESI 5           |
| S4                   | Bending strain calculated                                    | ESI 5           |
| S5                   | Torsional shifts of the phenyl groups                        | ESI 14          |
| S6                   | Torsion angles of benzils and oxalates                       | ESI 17          |
| S7                   | Normalized contacts                                          | ESI 26          |
| <b>Figures</b>       |                                                              |                 |
| S1-S3                | Calculation of elastic strain of benzil crystals             | ESI 6-8         |
| S4                   | Hot-stage microscopy of BZF and BZF_O                        | ESI 9           |
| S5                   | Differential thermograms of BZF and BZF_O                    | ESI 10          |
| S6                   | Hand-twisted crystals of BZF                                 | ESI 10          |
| S7                   | Flourescent images of BZF and BZF_O                          | ESI 11          |
| S8                   | Confocal microscopy images of BZF and BZC                    | ESI 11          |
| S9-S10               | Calculation of elastic strain of oxalate crystals            | ESI 12-13       |
| S11                  | Overlap images for the conformational comparison             | ESI 14          |
| S12                  | Relative contributions of interactions                       | ESI 18          |
| S13-S21              | Energy frameworks of benzils and oxalates                    | ESI 19-25       |
| S22-S27              | RDG plots of benzils and oxalates                            | ESI 27-29       |
| S28                  | Confocal microscopy images highlighting crystal delamination | ESI 30          |
| S29                  | Scanning electron microscopy images                          | ESI 30          |
| S30-S32              | Representative diffraction patterns obtained after bending   | ESI 31          |
| S33                  | Absorption and emission spectra of benzils                   | ESI 32          |

## Experimental details

### *Synthesis of oxalates:*

Diphenyl oxalate derivatives were prepared from para halo substituted phenols (15 mmol) and oxalyl chloride (7.5 mmol) using trimethylamine (15 mmol) in dry DCM (20 ml) and stirred for 3 hours in ice bath. White solid formed extracted with DCM and dried. Further Purified by crystallization. The Benzil compounds were obtained from Aldrich Chemicals and were used without further purification. The solvents employed were of spectroscopic grade and slow evaporation methods yielded the crystals suitable for mechanical bending.

**Optical and Hot-Stage Microscope (HSM).** Melting point determination were performed on a Leica DM 2500 P optical transmission microscope. The apparatus was equipped with a wide zoom camera and Mettler Toledo hot-stage. The crystalline samples were placed on a micro slide, inserted in the hot stage, and observed under the microscope. Images were recorded on heating in the same temperature regions where phase transitions were observed in DSC. The heating rate was 5°C/min.

### *Three-point bending experiments*

Three-point bending test experiments were conducted by using a universal material testing machine (Tensilon RTG-1210, A&D Co. Ltd.) at ambient conditions (20 °C). The single crystal was mounted on two-point support (copper wires) on copper blocks, and then force (load) was applied to the center of the specimens with a metal jig with a moving speed of 1 mm min<sup>-1</sup>.

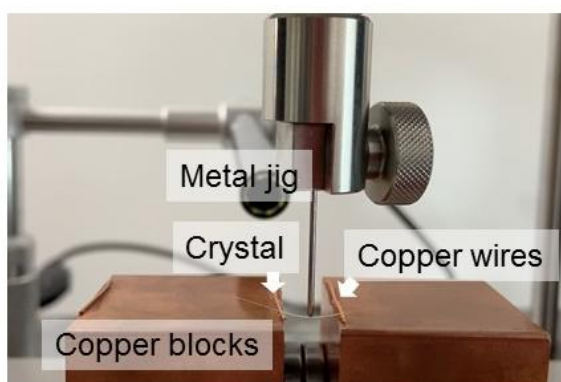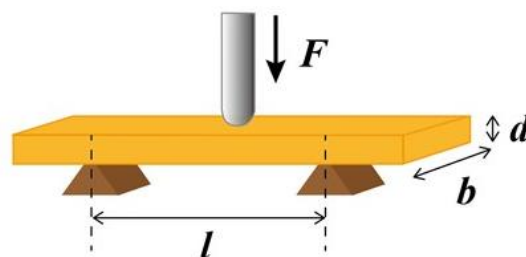

**D:** maximum deflection of the center of the beam

$$\text{Stress} = \frac{3Fl}{2bd^2} \quad \text{Strain} = \frac{6Dd}{l^2}$$

$$\text{Young's modulus} = \frac{\text{Stress}}{\text{Strain}}$$

**Differential Scanning Calorimetry (DSC):** The crystallization and melting behavior of samples were analyzed using a differential scanning calorimeter (TA Q2000). About 3 mg of each sample was accurately weighed in aluminum pans and subjected to the thermal scan from room temperature to 150°C at a rate of 5°C/min.

**Single crystal X-ray Diffraction:** The diffraction data of single crystals were collected on a Bruker Apex-II diffractometer using graphite monochromated Mo-K $\alpha$  radiation. The data was processed with the SMART software suite. The structure solution was carried out by direct methods, and the refinements were performed by full-matrix least-squares on *F*<sup>2</sup> using the SHELXTL suite of programs.

**Hirshfeld surface analysis:** Hirshfeld surface 2D fingerprint plot was constructed using Crystal Explorer (Ver. 17.5, University of Western Australia). The intermolecular interaction and energy frameworks were calculated at B3LYP/6-31G(d,p) level of dispersion-corrected density functional theory basis set. The energy framework was constructed based on the total intermolecular interaction energy, inclusive of electrostatic, polarization, dispersion and exchange-repulsion components.

**Molecular Electrostatic Potential (MESP) Analysis:** Theoretical calculations were carried out in Gaussian 16. We optimized the molecules and calculated their MESP with a DFT method at the level of B3LYP/6-311+G(d,p) till the Br-derivatives and B3LYP/DGDZVP for the I-derivatives. MESP for individual molecules was visualized in GaussView 6.0. NCI analysis was carried out in the Multiwfn 3.7 software, visualized in VMD, and plotted using GNU plot.

#### **Absorption & Emission spectra**

The UV-Vis range of 200 to 700 nm wavelength was measured using a spectrophotometer (SHIMADZU UV-2401PC, Shimadzu Japan) by sandwiching the crystalline sample between two quartz plates. The fluorescence spectra were recorded on a SPEX-Fluorolog-3 FL3-221 spectrofluorimeter (excitation wavelengths for BZF, BZC & BZB - 411nm, BZF\_O - 375 nm, respectively). In the solid-state, the sample was ground with BaSO<sub>4</sub>, and the absolute quantum yield was calculated by the integrating sphere (Quanta- $\phi$ , Horiba) method.

**Table S1** Melting Points of the crystalline compounds

| Compound | Melting point(°C) |
|----------|-------------------|
| BZ       | 94-98             |
| BZF_O    | 118-122           |
| BZF      | 117-120           |
| BZC      | 196-197           |
| BZB      | 228-229           |
| BZI      | 243-245           |
| OXH      | 138-140           |
| OXF      | 150-154           |
| OXC      | 183-187           |
| OXB      | 188-190           |
| OXI      | 199-205           |

**Table S2** Unit cell parameters of the new polymorph **BZF**

| Compound                           | BZF                                                          |
|------------------------------------|--------------------------------------------------------------|
| Formula                            | C <sub>14</sub> H <sub>8</sub> F <sub>2</sub> O <sub>2</sub> |
| CCDC Nos.                          | 2142844                                                      |
| Formula Wt.                        | 246.20                                                       |
| Crystal habit                      | Acicular                                                     |
| Crystal colour                     | Pale yellow                                                  |
| Crystal system                     | Orthorhombic                                                 |
| Space group                        | <i>P</i> 2 <sub>1</sub> 2 <sub>1</sub> 2                     |
| <i>a</i> (Å)                       | 6.142(3)                                                     |
| <i>b</i> (Å)                       | 23.249(14)                                                   |
| <i>c</i> (Å)                       | 4.015(2)                                                     |
| $\alpha$ (°)                       | 90                                                           |
| $\beta$ (°)                        | 90                                                           |
| $\gamma$ (°)                       | 90                                                           |
| <i>V</i> (Å <sup>3</sup> )         | 573.33(5)                                                    |
| <i>Z</i>                           | 2                                                            |
| <i>D</i> calc(g cm <sup>-3</sup> ) | 1.426                                                        |
| <i>T</i> (K)                       | 298(2)                                                       |
| ( $\lambda$ )Mo K $\alpha$         | 0.71073                                                      |
| $\mu$ (mm <sup>-1</sup> )          | 0.117                                                        |
| 2 $\theta$ range (°)               | 54.98                                                        |
| Total Reflns.                      | 7181                                                         |
| Unique Reflns.                     | 1315                                                         |
| Reflns. Used                       | 987                                                          |
| No. Parameters                     | 82                                                           |
| GOF on <i>F</i> <sup>2</sup>       | 1.119                                                        |
| Final <i>R</i> 1, <i>wR</i> 2      | 0.0411,0.0943                                                |

**Table S3** Unit cell parameters of the crystals studied for comparative analysis

| Compounds            | <b>BZH</b>                                     | <b>BZF_O</b>                                                 | <b>BZC</b>                                                    | <b>BZB</b>                                                    | <b>BZI</b>                                                   |
|----------------------|------------------------------------------------|--------------------------------------------------------------|---------------------------------------------------------------|---------------------------------------------------------------|--------------------------------------------------------------|
| <b>Formula</b>       | C <sub>14</sub> H <sub>10</sub> O <sub>2</sub> | C <sub>14</sub> H <sub>8</sub> F <sub>2</sub> O <sub>2</sub> | C <sub>14</sub> H <sub>8</sub> Cl <sub>2</sub> O <sub>2</sub> | C <sub>14</sub> H <sub>8</sub> Br <sub>2</sub> O <sub>2</sub> | C <sub>14</sub> H <sub>8</sub> I <sub>2</sub> O <sub>2</sub> |
| <b>Space group</b>   | <i>P</i> 3 <sub>1</sub> 21                     | <i>P</i> 2 <sub>1</sub> /c                                   | <i>P</i> 2/n                                                  | <i>P</i> 2 <sub>1</sub> 2 <sub>1</sub> 2                      | <i>P</i> 2 <sub>1</sub> 2 <sub>1</sub> 2                     |
| <i>a</i> (Å)         | 8.360(2)                                       | 12.135(2)                                                    | 6.029(2)                                                      | 6.006(12)                                                     | 5.878(8)                                                     |
| <i>b</i> (Å)         | 8.360(2)                                       | 7.350(1)                                                     | 3.869(1)                                                      | 26.006(5)                                                     | 27.12(4)                                                     |
| <i>c</i> (Å)         | 13.406(3)                                      | 13.157(2)                                                    | 25.320(8)                                                     | 4.0378(8)                                                     | 4.147(4)                                                     |
| $\alpha$ (°)         | 90                                             | 90                                                           | 90                                                            | 90                                                            | 90                                                           |
| $\beta$ (°)          | 90                                             | 110.51(1)                                                    | 92.00(2)                                                      | 90                                                            | 90                                                           |
| $\gamma$ (°)         | 120                                            | 90                                                           | 90                                                            | 90                                                            | 90                                                           |
| <b>Z</b>             | 3                                              | 4                                                            | 2                                                             | 2                                                             | 2                                                            |
| <b>CSD Ref Code.</b> | BENZIL07                                       | YODPOX                                                       | UVEKOW                                                        | EFUZIP01                                                      | UVEKUC                                                       |

**Table S3 (contd...)**

| Compounds             | <b>OXH</b>                                     | <b>OXF</b>                                                   | <b>OXC</b>                                                    | <b>OXB</b>                                                    | <b>OXI</b>                                                   |
|-----------------------|------------------------------------------------|--------------------------------------------------------------|---------------------------------------------------------------|---------------------------------------------------------------|--------------------------------------------------------------|
| <b>Formula</b>        | C <sub>14</sub> H <sub>10</sub> O <sub>4</sub> | C <sub>14</sub> H <sub>8</sub> F <sub>2</sub> O <sub>4</sub> | C <sub>14</sub> H <sub>8</sub> Cl <sub>2</sub> O <sub>4</sub> | C <sub>14</sub> H <sub>8</sub> Br <sub>2</sub> O <sub>4</sub> | C <sub>14</sub> H <sub>8</sub> I <sub>2</sub> O <sub>4</sub> |
| <b>Space group</b>    | <i>P</i> 2 <sub>1</sub> /n                     | <i>P</i> 2 <sub>1</sub> /c                                   | <i>P</i> 2 <sub>1</sub> /c                                    | <i>P</i> 2 <sub>1</sub> /c                                    | <i>C</i> c                                                   |
| <i>a</i> (Å)          | 10.622(2)                                      | 6.898(14)                                                    | 12.480(3)                                                     | 12.054(2)                                                     | 9.555(19)                                                    |
| <i>b</i> (Å)          | 7.836(1)                                       | 11.480(2)                                                    | 3.810(8)                                                      | 3.976(8)                                                      | 9.679(19)                                                    |
| <i>c</i> (Å)          | 14.084(2)                                      | 8.376(17)                                                    | 14.151(3)                                                     | 14.204(3)                                                     | 31.313(6)                                                    |
| $\alpha$ (°)          | 90                                             | 90                                                           | 90                                                            | 90                                                            | 90                                                           |
| $\beta$ (°)           | 103.62(1)                                      | 110.79(3)                                                    | 96.90(3)                                                      | 94.53(3)                                                      | 97.02(3)                                                     |
| $\gamma$ (°)          | 90                                             | 90                                                           | 90                                                            | 90                                                            | 90                                                           |
| <b>Z</b>              | 4                                              | 2                                                            | 2                                                             | 2                                                             | 8                                                            |
| <b>CCDC Ref Code.</b> | HEKTUM                                         | SEJSIM                                                       | LAQKIA                                                        | SEJSOS                                                        | SEJSUY                                                       |

**Table S4** Bending strain calculation

| Compound   | Elastic strain | Elastic recovery I <sup>†</sup> | Elastic recovery II <sup>‡</sup> |
|------------|----------------|---------------------------------|----------------------------------|
| <b>BZB</b> | 2.45           | 2.6                             | 1.26                             |
| <b>BZC</b> | 2.39           | 3.5                             | 2.58                             |
| <b>BZF</b> | 2.36           | 3.35                            | 3.19                             |
| <b>OXC</b> | 1.05           | 1.1                             | 2.39                             |
| <b>OXB</b> | 1.18           | 0.71                            | 0.82                             |

<sup>†</sup> Corresponds to the partial recovery of the crystals beyond the elastic limit

<sup>‡</sup> Corresponds to the residual recovery even when the crystals are plastically deformed

# Calculation of elastic strain using the Euler-Bernoulli's beam bending theory

**BZB**

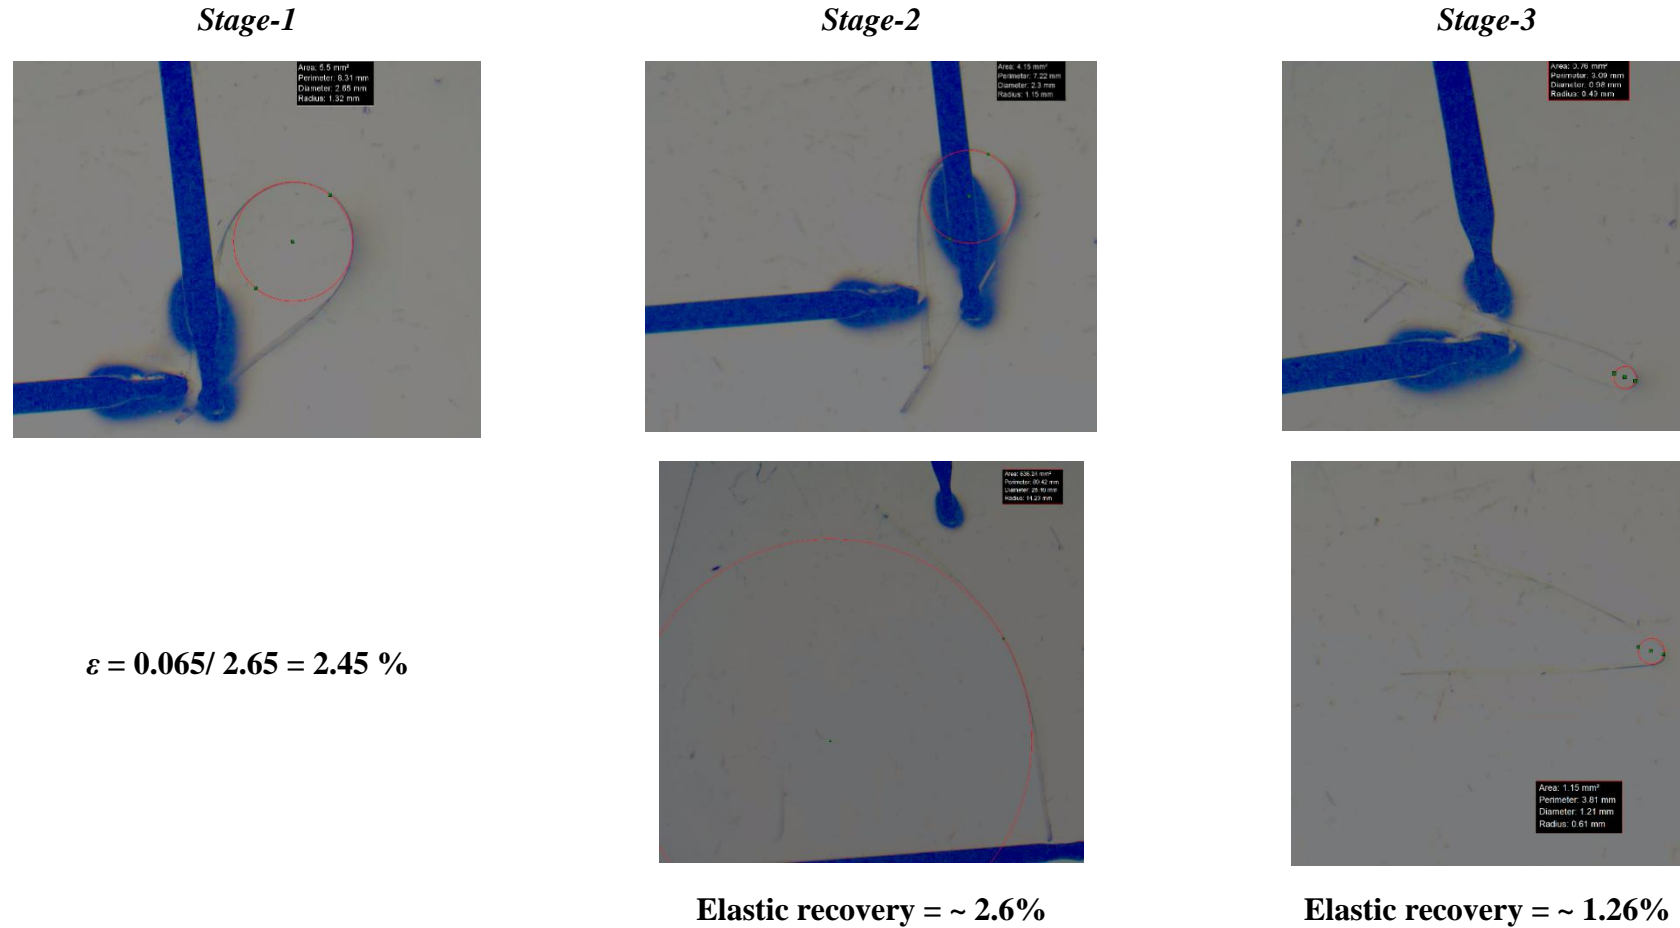

**Fig. S1** Calculation of elastic strain, percentage of elastic recovery after plastic deformation at the different stages of the mechanical bending of BZB.

**BZC**

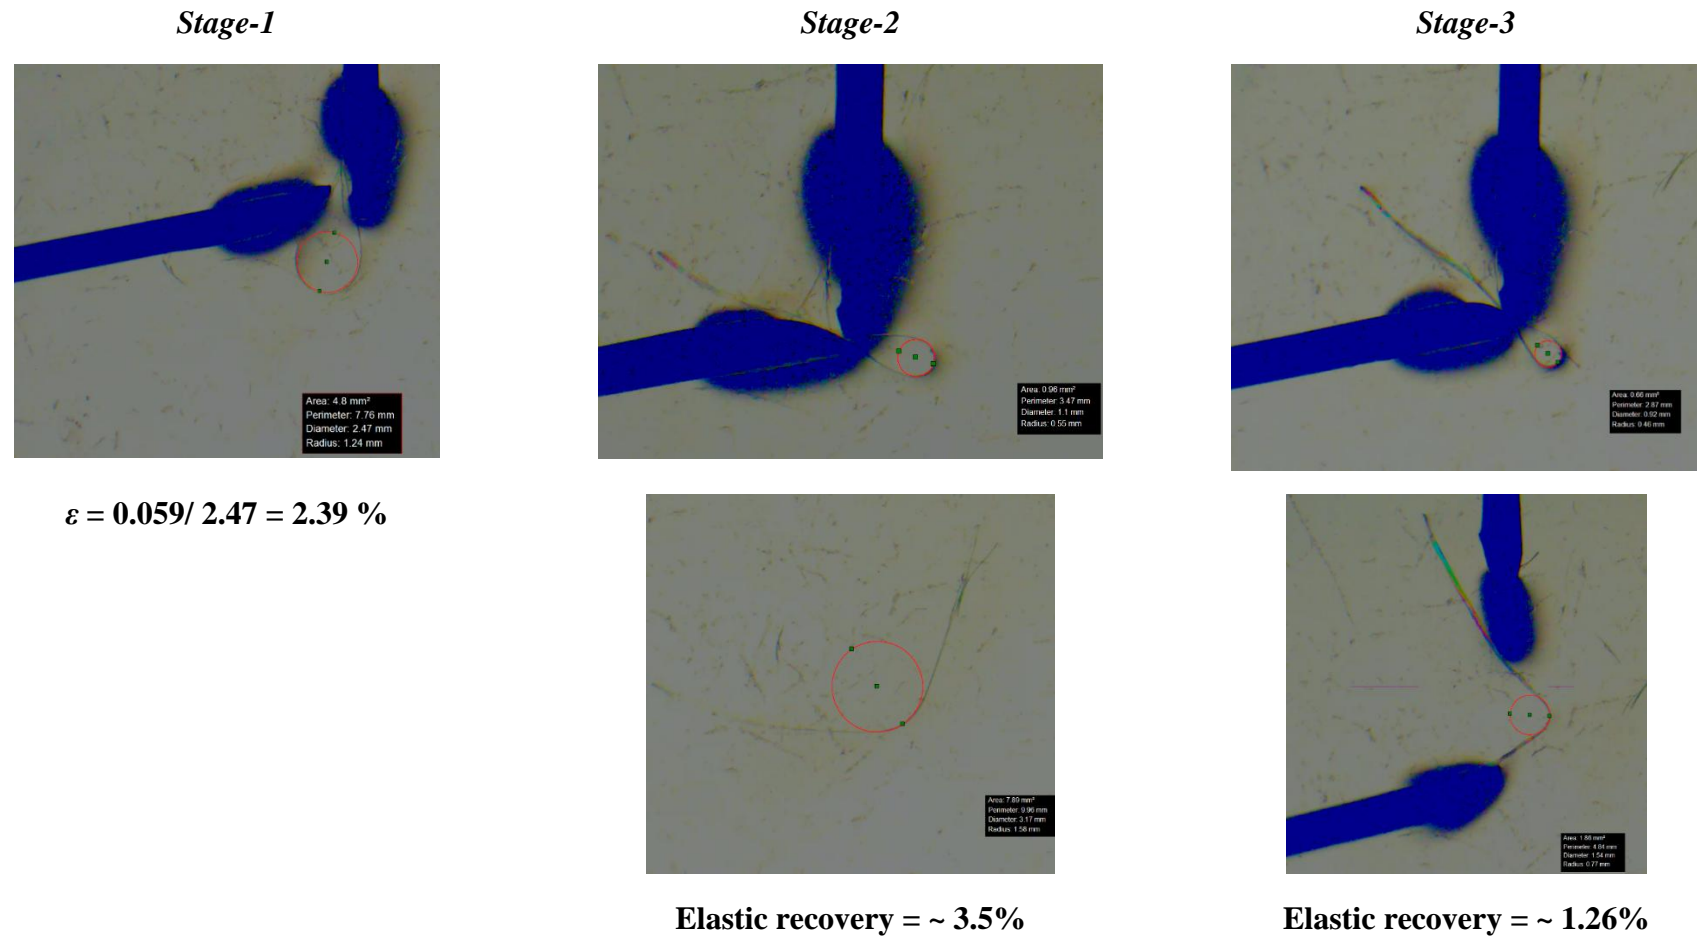

**Fig. S2** Calculation of elastic strain, percentage of elastic recovery after plastic deformation at the different stages of the mechanical bending of BZC..

**BZF**

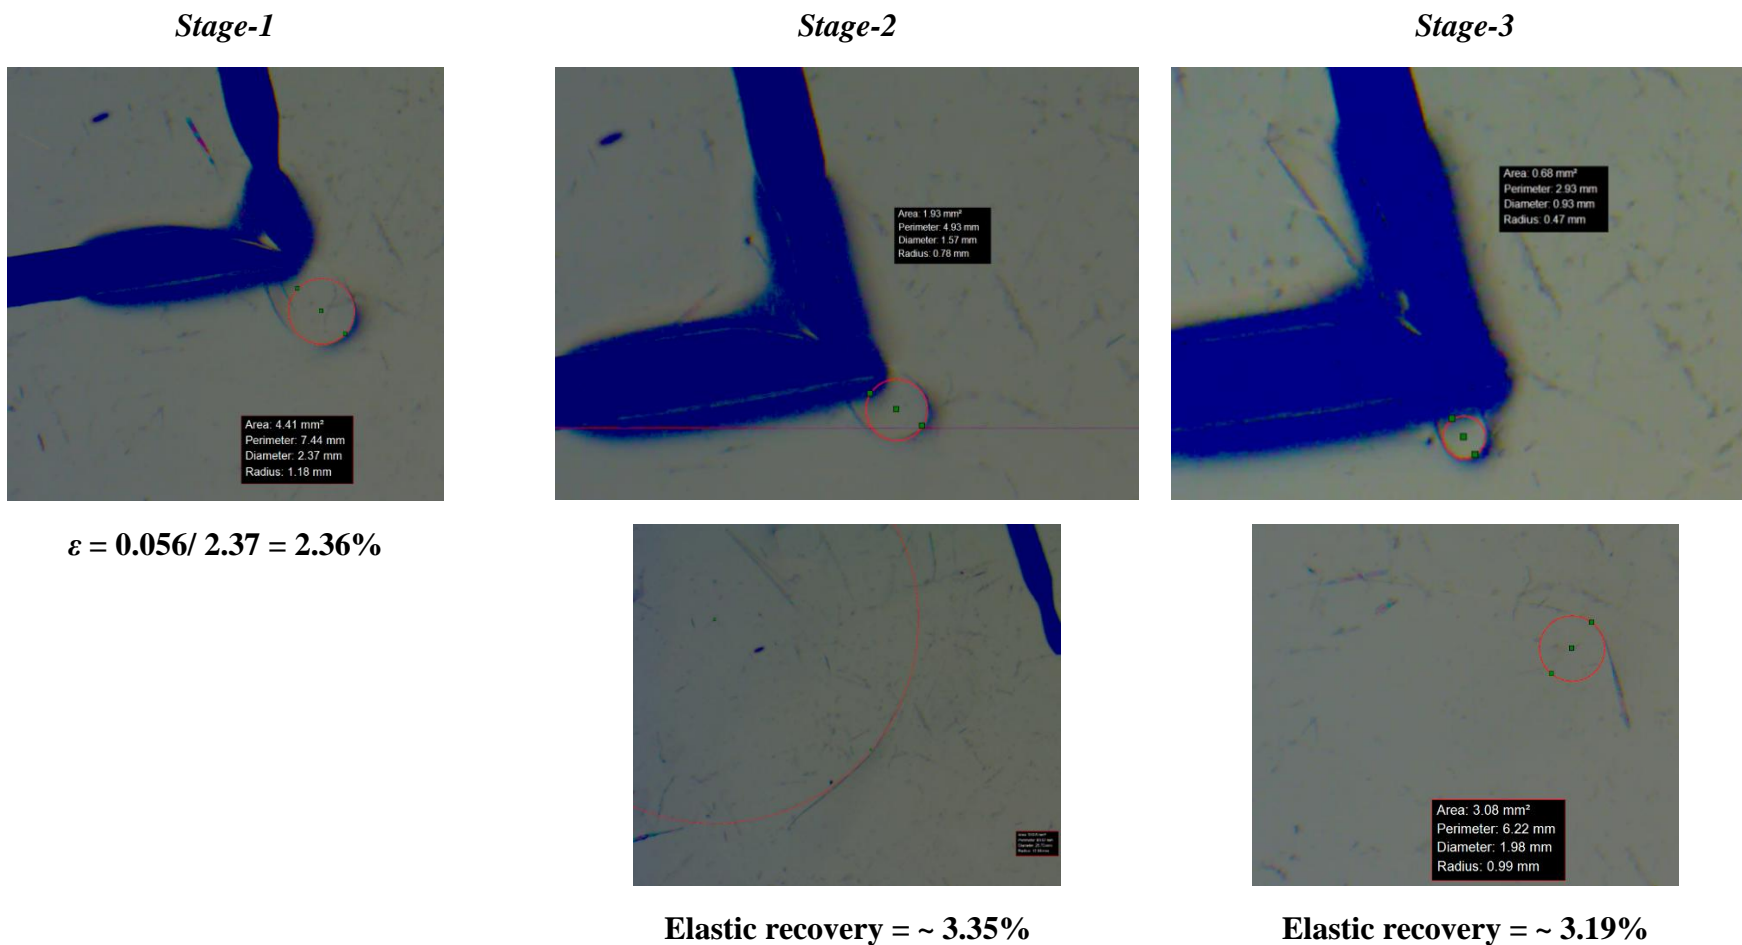

**Fig. S3** Calculation of elastic strain, percentage of elastic recovery after plastic deformation at the different stages of the mechanical bending of BZF.



### Hot-stage microscopy (HSM) images

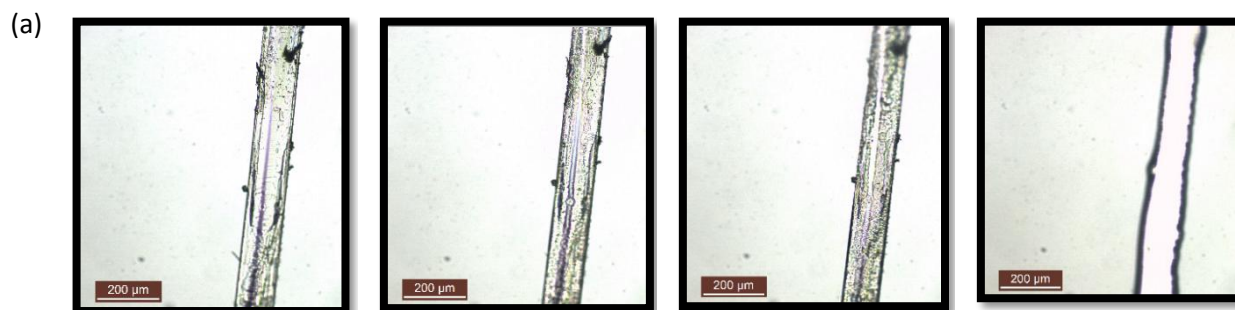

40

100

117

120

The crystal melting recorded in °C. It melts in the temperature range of 117-120 °C

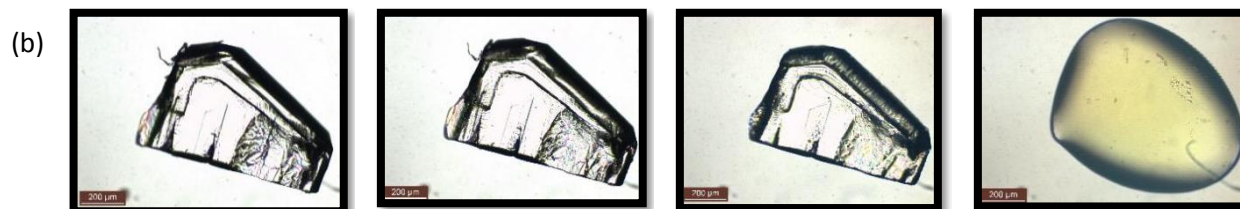

40

100

118

122

The crystal melting recorded in °C. It melts in the temperature range of 118-122 °C

**Fig. S4** Hot-stage microscopy images showing the thermal characteristics of the dimorphs (a) BZF and (b) BZF\_O

### DSC thermogram

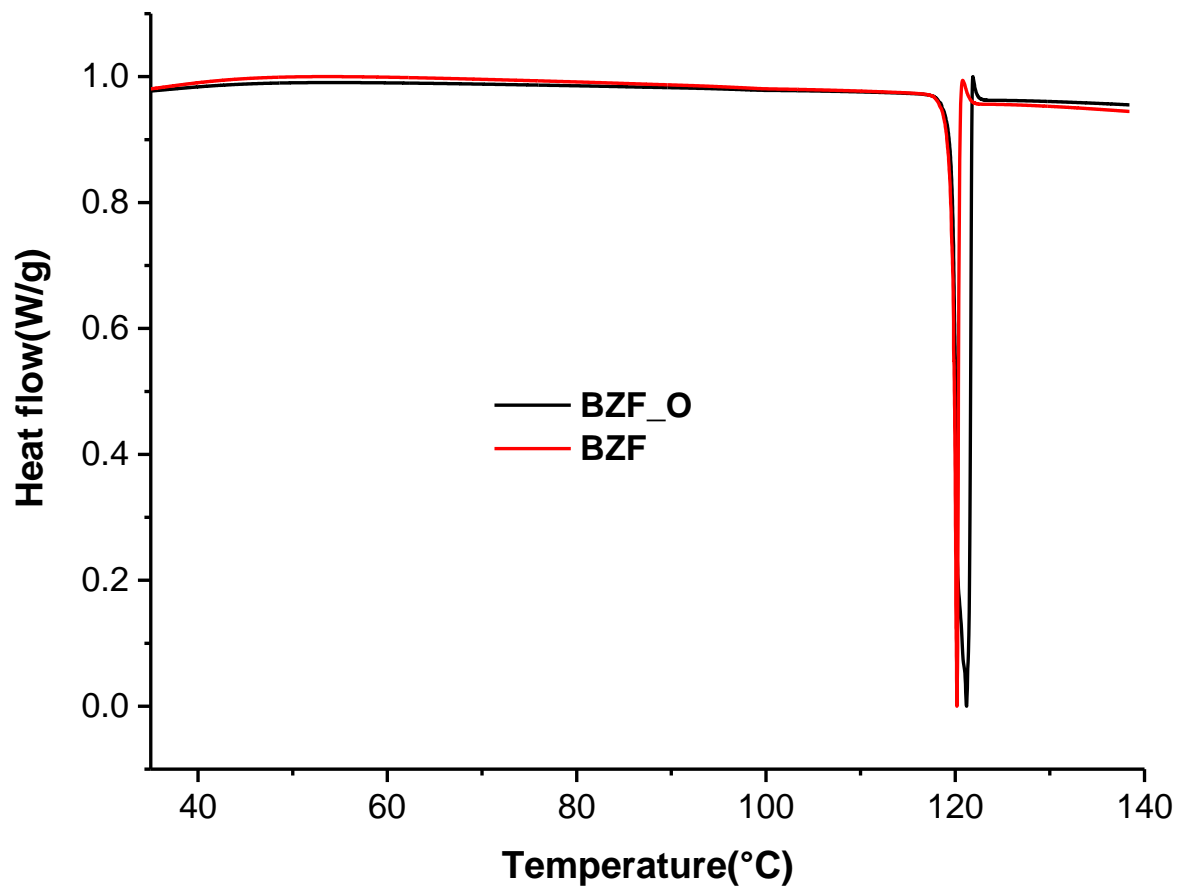

Fig. S5 DSC thermogram of BZF\_O and BZF

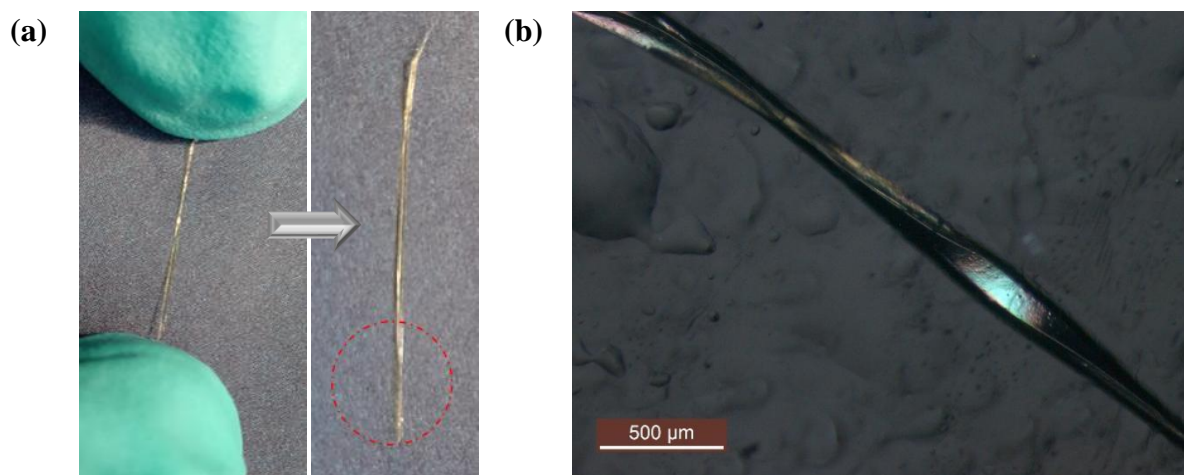

Fig. S6 Twisted crystals of **BZF** (a) Hand twisted crystal (b) out of plane wrapping

**BZF**

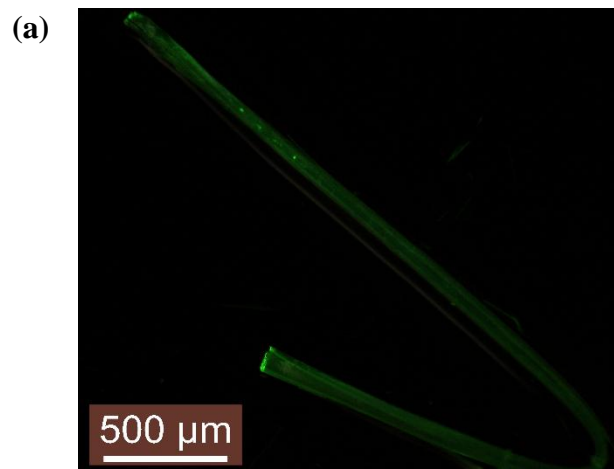

**BZF\_O**

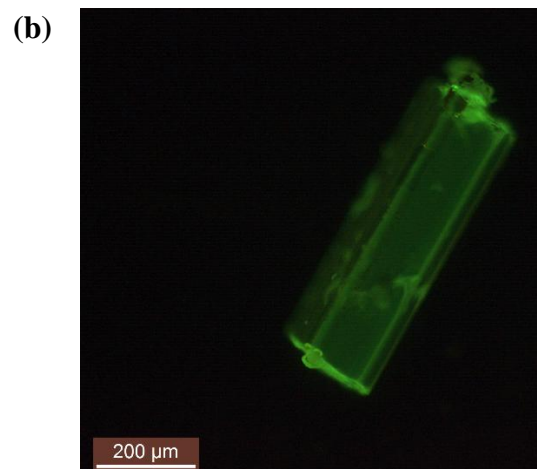

**Fig. S7** Fluorescent images of the dimorphs of the F-derivative of benzil: (a)BZF (b)BZF\_O. Note the lightened ends of the crystals.

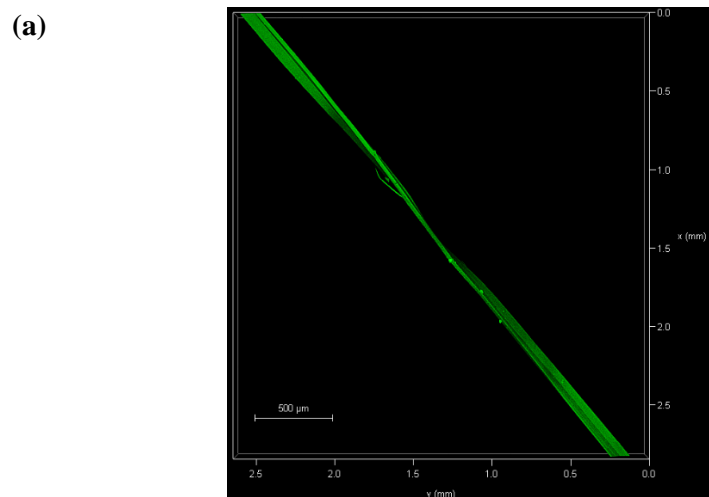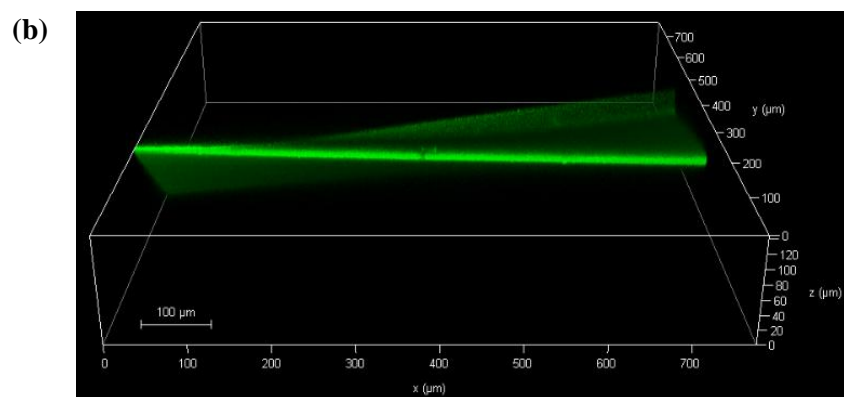

**Fig. S8** Additional confocal microscopy images highlighting the twisted nature of the crystals of (a) BZF and (b) BZF (note the out of plane bending in the twisted crystal).

# Calculation of elastic strain using the Euler-Bernoulli's beam bending theory

## OXB

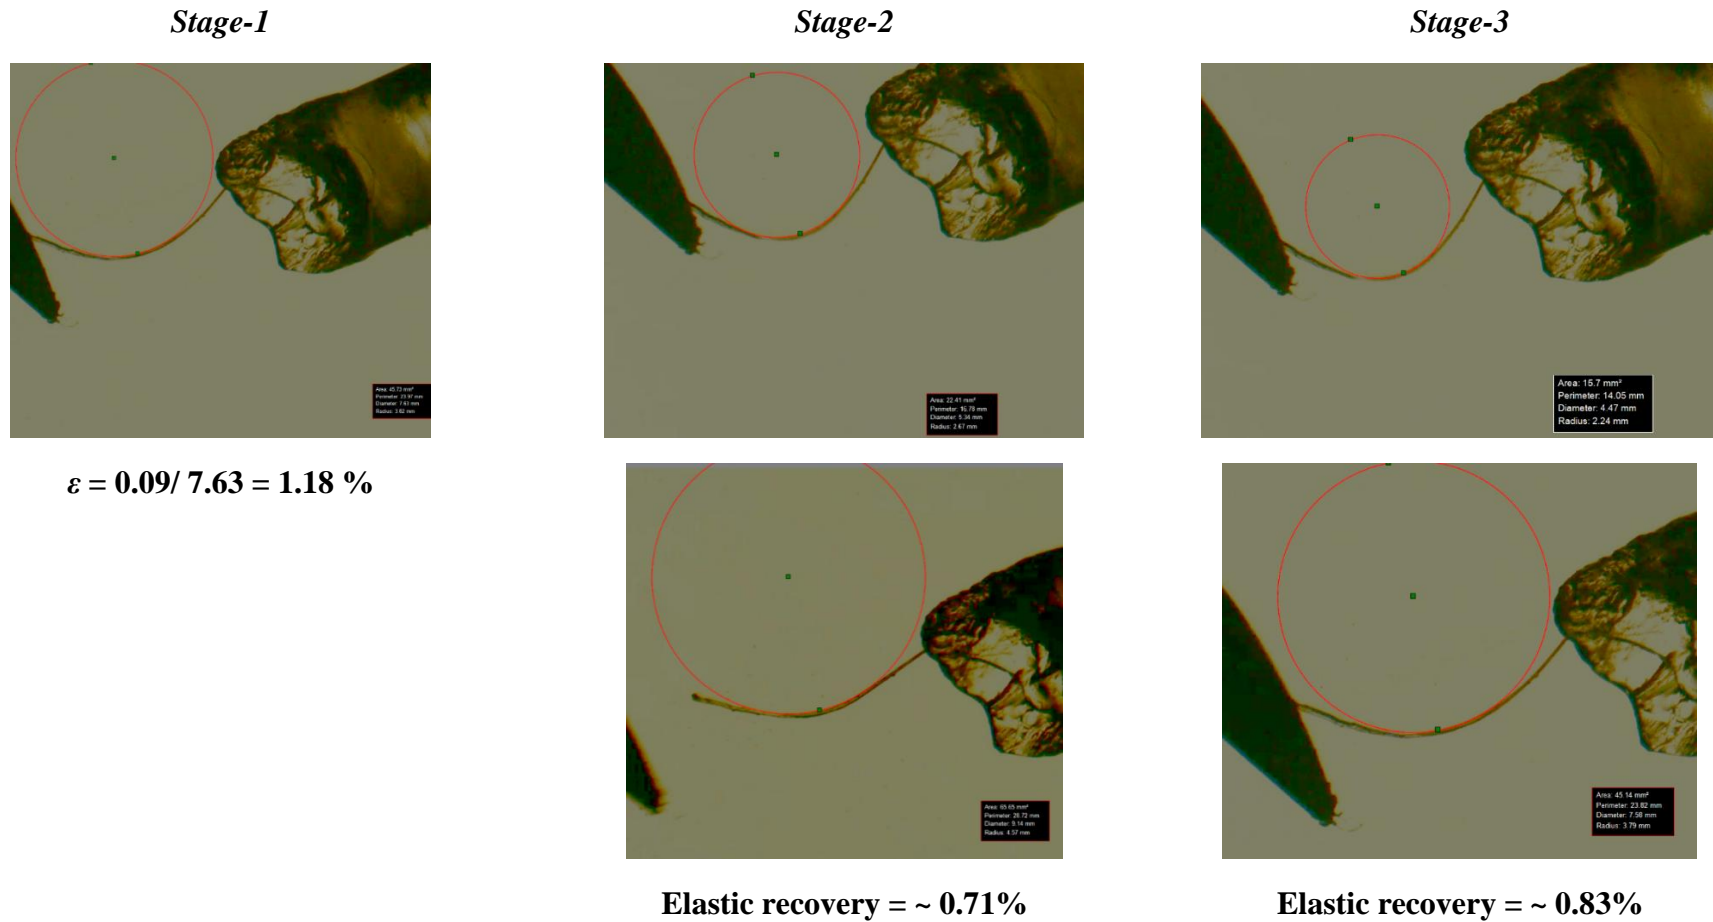

**Fig. S9** Calculation of elastic strain, percentage of elastic recovery after plastic deformation at the different stages of the mechanical bending of OXB.

OXC

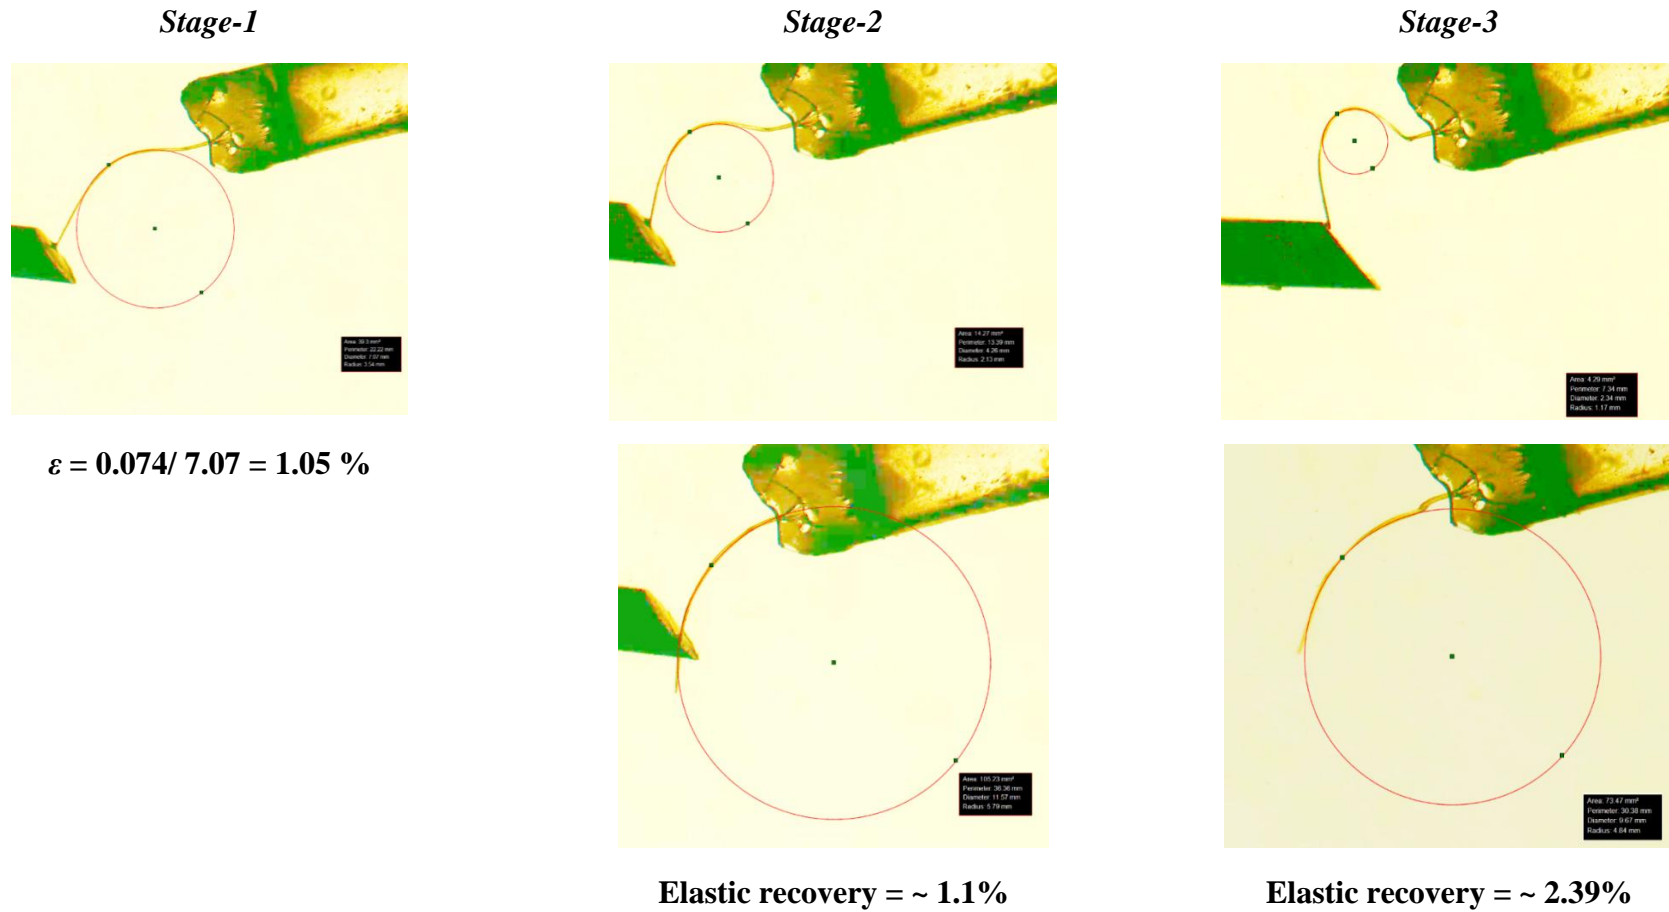

**Fig. S10** Calculation of elastic strain, percentage of elastic recovery after plastic deformation at the different stages of the mechanical bending of OXC.

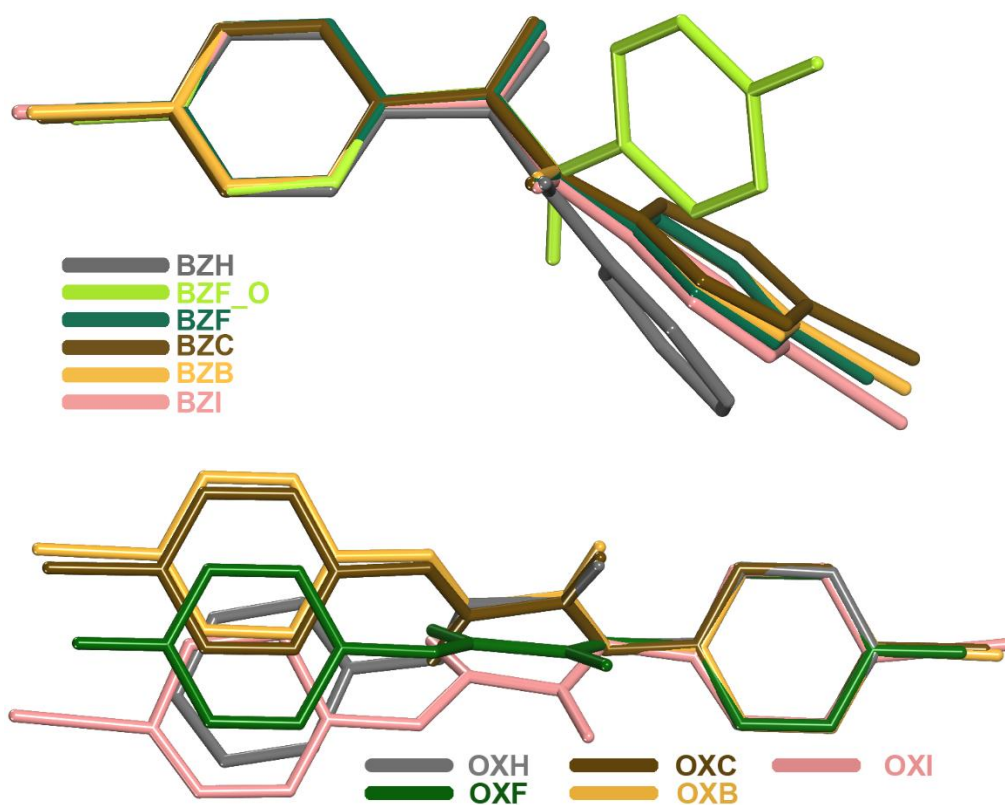

**Fig. S11** Overlap images to compare the conformational preferences adopted by (a) benzils and (b) oxalates

**Table S5** The torsional twist adopted by the phenyl rings in the compounds

| Compound |        | Phenyl twist angle (°) |
|----------|--------|------------------------|
| OXH      |        | 22.56                  |
| OXF      |        | 0                      |
| OXC      |        | 0                      |
| OXB      |        | 0                      |
| OXI      | Type 1 | 2.69                   |
|          | Type 2 | 1.36                   |
| BZH      |        | 76.77                  |
| BZF_O    |        | 64.74                  |
| BZF      |        | 57.65                  |
| BZC      |        | 53.72                  |
| BZB      |        | 57.28                  |
| BZI      |        | 60.97                  |

**BZH**

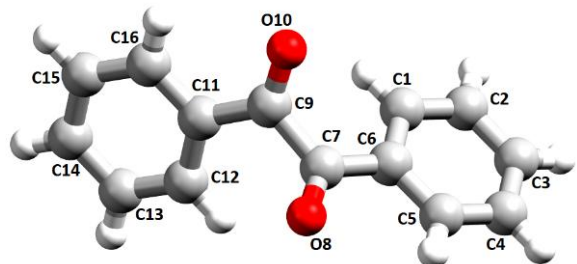

**BZF**

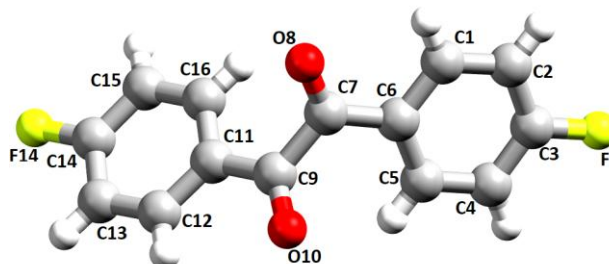

**BZC**

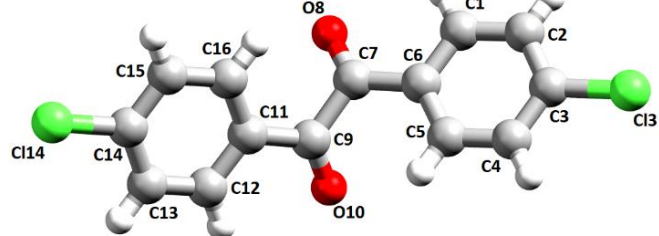

**BZB**

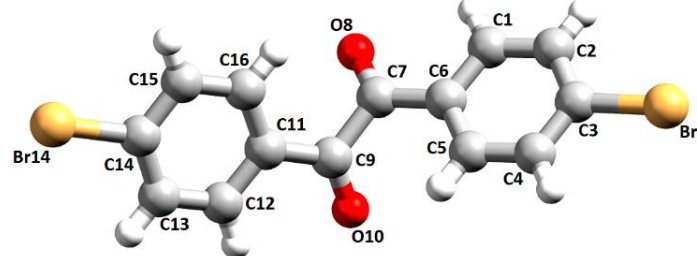

**BZI**

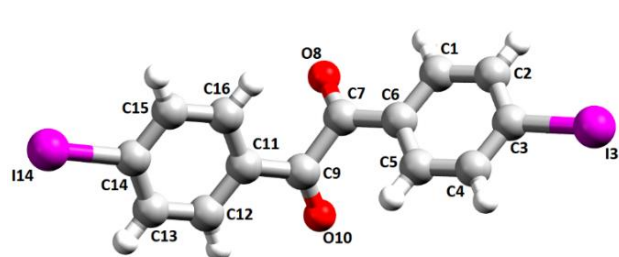

**OXH**

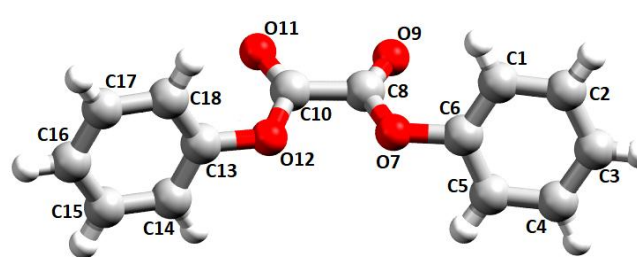

**OXF**

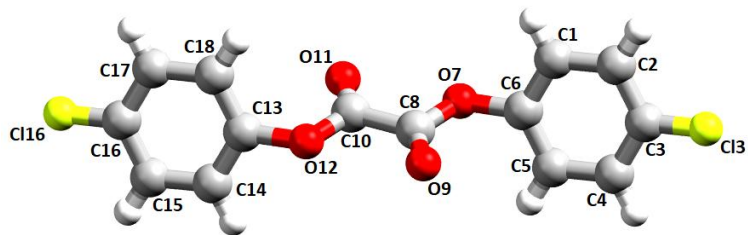

**OXC**

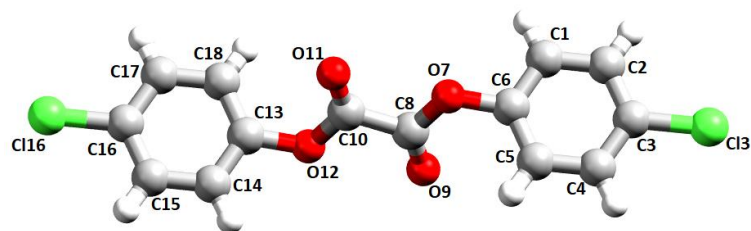

**OXB**

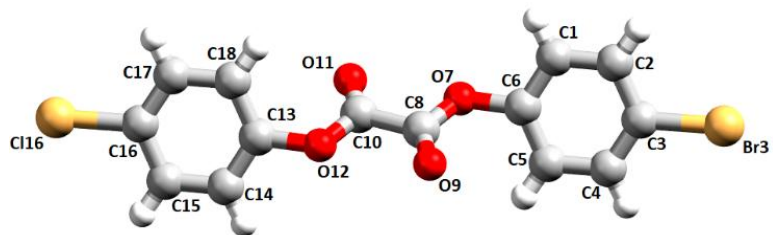

**OXI**

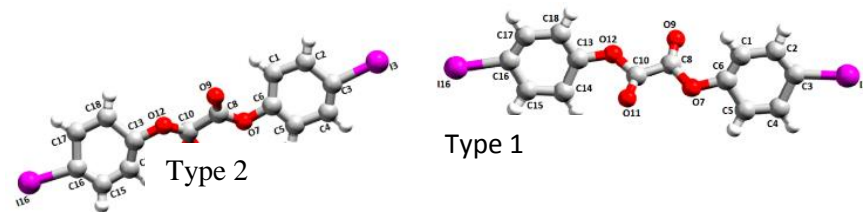



**Table S6** Torsion angles adopted by the benzil and oxalate compounds

Torsion angles adopted by the benzil compounds

| Torsion angle                | Compound |           |           |           |           |          |
|------------------------------|----------|-----------|-----------|-----------|-----------|----------|
|                              | BZH      | BZF_O     | BZF       | BZC       | BZB       | BZI      |
| <b>O = C-C = O</b>           | 107.4(2) | -110.6(1) | 117.0(2)  | 118.5(1)  | 116.1(3)  | 114.6(4) |
| <b>C(6)-C(7)-C (9)-C(11)</b> | 115.3(1) | -119.6(1) | 127.2(2)  | 131.6(1)  | 127.8(3)  | 125.4(4) |
| <b>C(5)-C(6)-C (7)-C(9)</b>  | 172.2(1) | 11.0(2)   | -5.3(3)   | -6.5(2)   | -6.0(4)   | -7.8(5)  |
| <b>C(5)-C(6)-C (7)-O(8)</b>  | -3.5(2)  | -174.3(1) | -179.8(2) | -179.5(1) | -179.8(2) | 178.0(4) |
| <b>C(1)-C(6)-C (7)-O(8)</b>  | 174.8(1) | 5.7(2)    | -0.1(3)   | -0.2(2)   | -1.1(4)   | -1.2(6)  |
| <b>C(6)-C(7)-C (9)-O(10)</b> | -68.7(2) | 64.4(1)   | -57.9(3)  | -55.0(2)  | -58.1(3)  | -60.0(5) |

Torsion angles adopted by the oxalate compounds

| Torsion angle                               | Compound  |           |           |             |           |           |
|---------------------------------------------|-----------|-----------|-----------|-------------|-----------|-----------|
|                                             | OXH       | OXF       | OXC       | OXB         | OXI       |           |
|                                             |           |           |           |             | Type 1    | Type 2    |
| <b>O<sub>c</sub>-C-C-O<sub>c</sub></b>      | -8.8(3)   | 180       | 180       | 180         | 172.0(2)  | 175.0(2)  |
| <b>O = C-C = O</b>                          | -8.5(4)   | 180       | 180       | 180         | 168.0(3)  | 168.0(2)  |
| <b>O<sub>c</sub> (7) = C(8)-C(10)-O(11)</b> | 172.0(3)  | -0.4(3)   | -1.0(3)   | -0.28 /0(1) | -3.0(4)   | -4(3)     |
| <b>O<sub>c</sub> (12) = C(10)-C(8)-O(9)</b> | 170.7(3)  | 0.4(3)    | 1.0(3)    | 0.28        | 7.0(4)    | -13.0(3)  |
| <b>C(6)-O(7)-C (8)-O(9)</b>                 | 3.4(4)    | -2.0(3)   | -2.2(3)   | -3.0(1)     | 1.0(4)    | 14.0(4)   |
| <b>C(13)-O(12)-C (10)-O(11)</b>             | 0.5(4)    | 2.0(3)    | 2.2(3)    | 3.0(1)      | -20.0(3)  | -6.0(3)   |
| <b>C(8)-O(7)-C (6)-C(5)</b>                 | -118.0(3) | 70.3(3)   | 60.5(3)   | 57.8(9)     | -138.0(2) | -135.0(2) |
| <b>C(10)-O(12)-C (13)-C(14)</b>             | 112.2(3)  | -112.6(2) | -124.2(2) | 126.1(7)    | -32.0(3)  | -45.0(3)  |

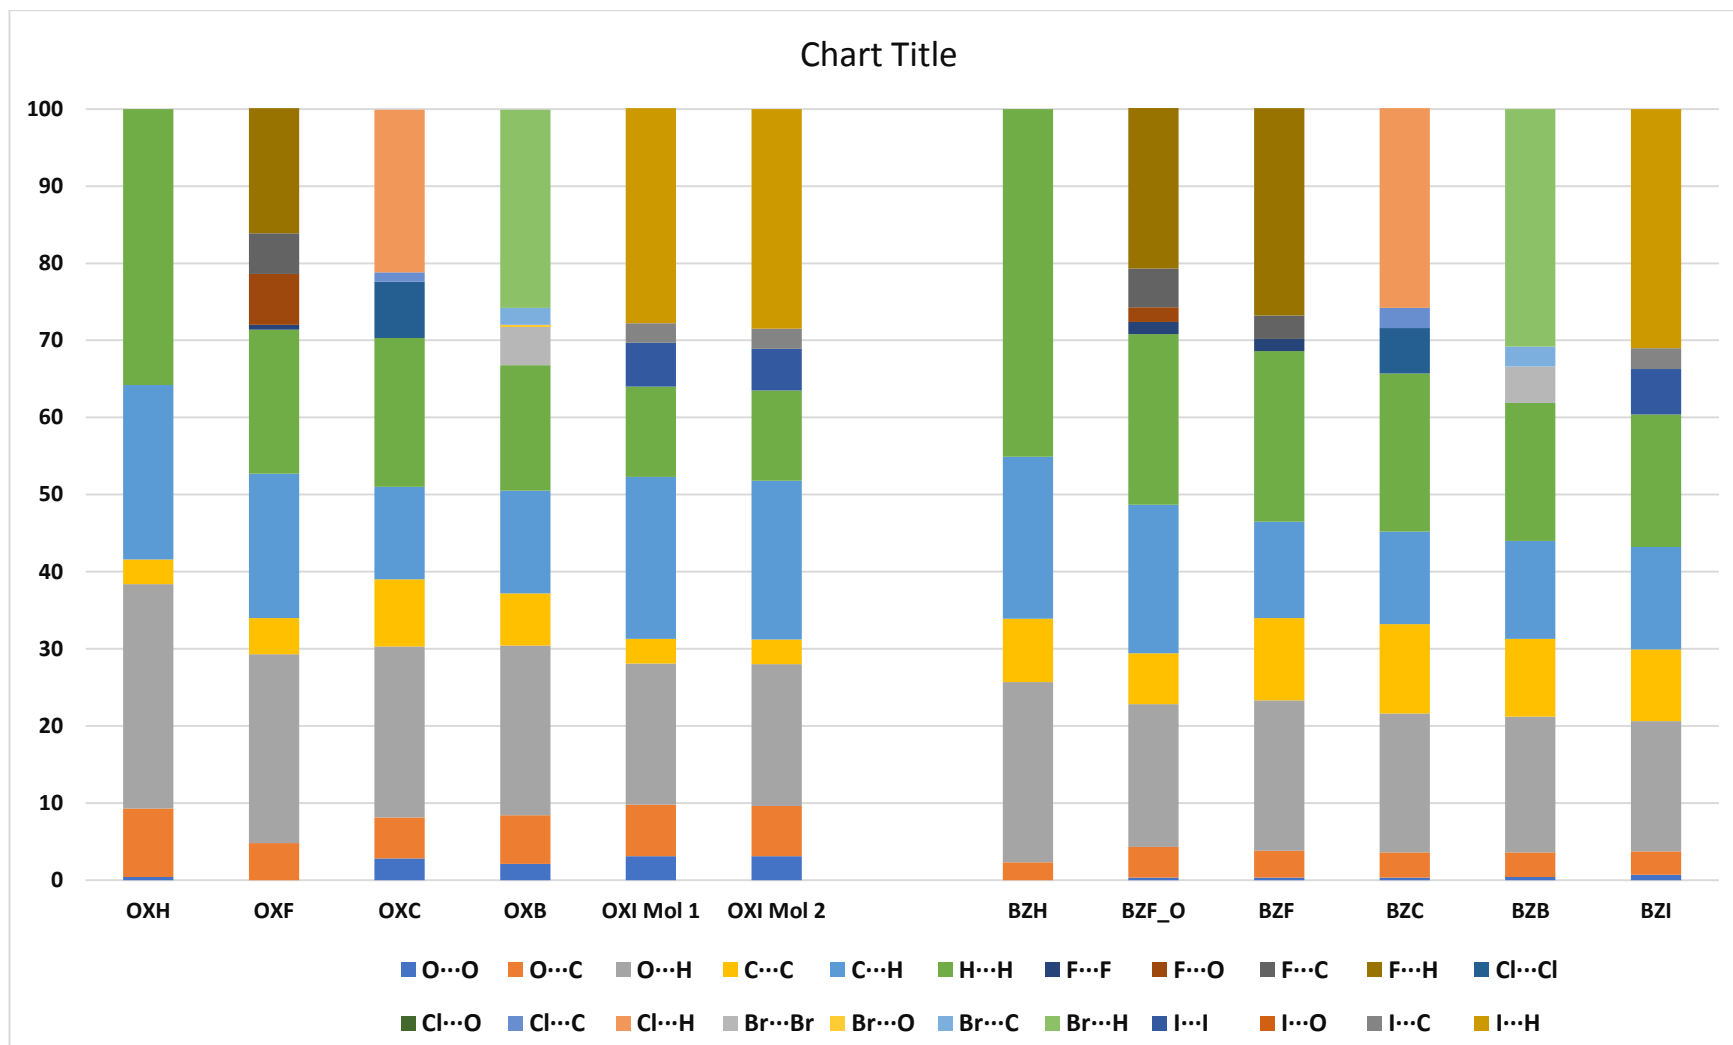

**Fig. 12** The relative contribution of interactions, as derived from the Hirschfeld analysis.

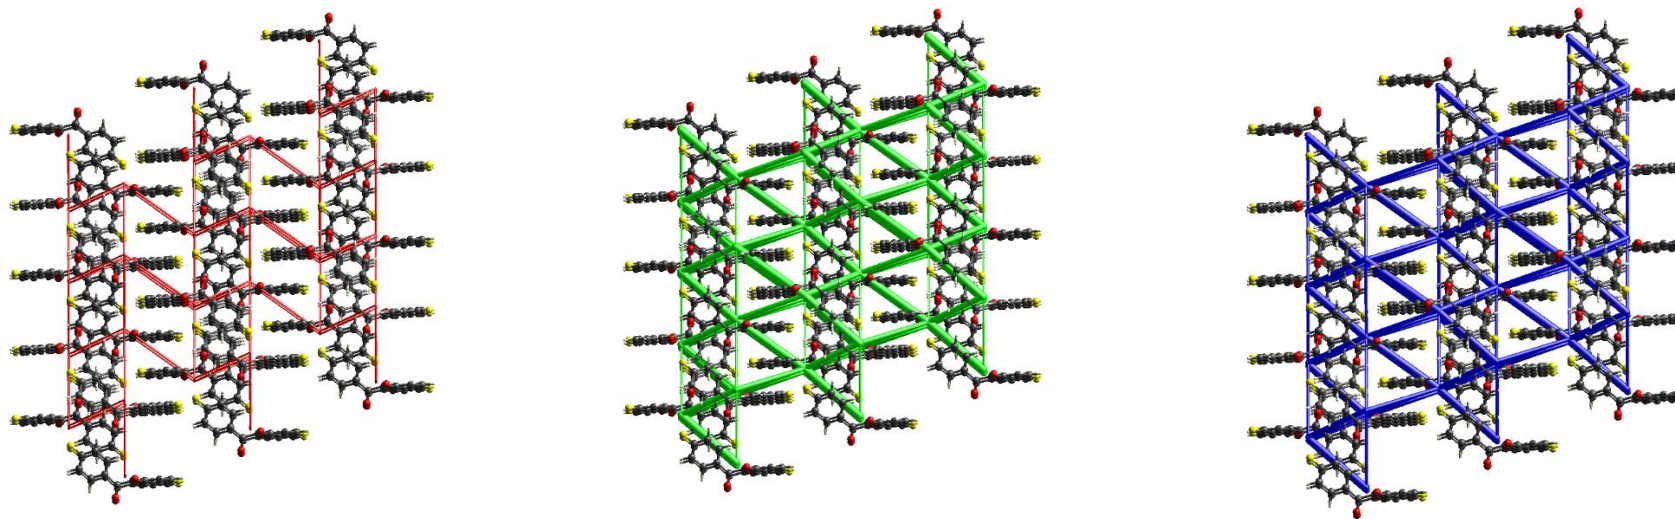

**Fig. S13** The energy frameworks of BZF\_O. The electrostatic, dispersive, and total energy are represented in red, green, and blue tubes. The size of the tubes is related to the strength of the interactions.

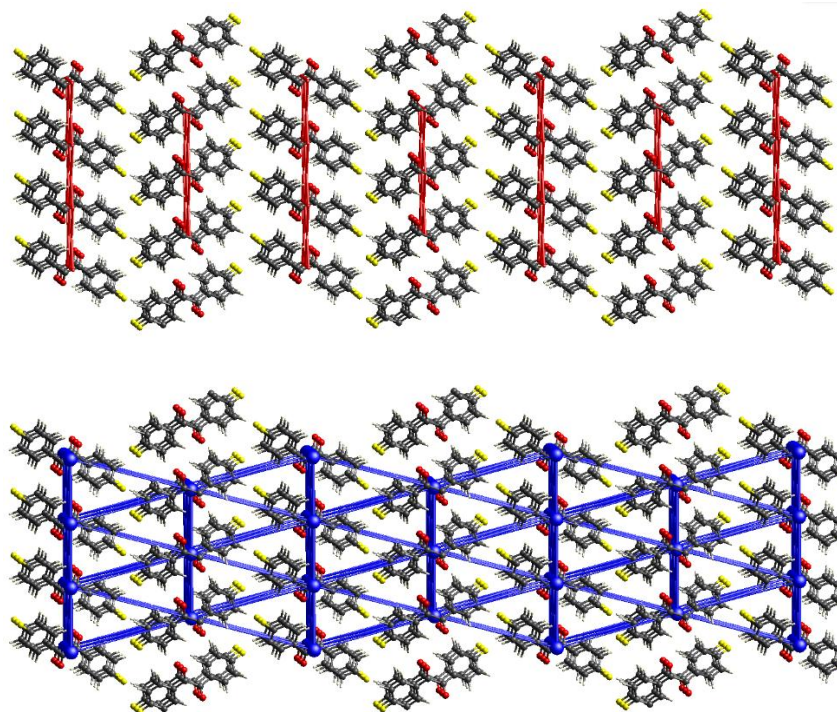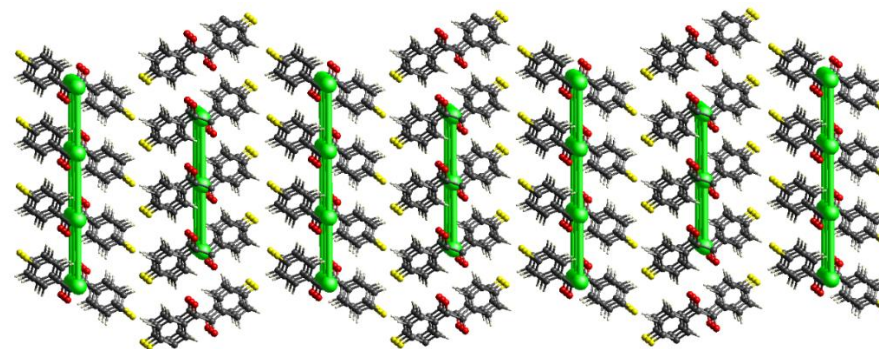

**Fig. S14** The energy frameworks of BZF. The electrostatic, dispersive, and total energy are represented in red, green, and blue tubes. The size of the tubes is related to the strength of the interactions.

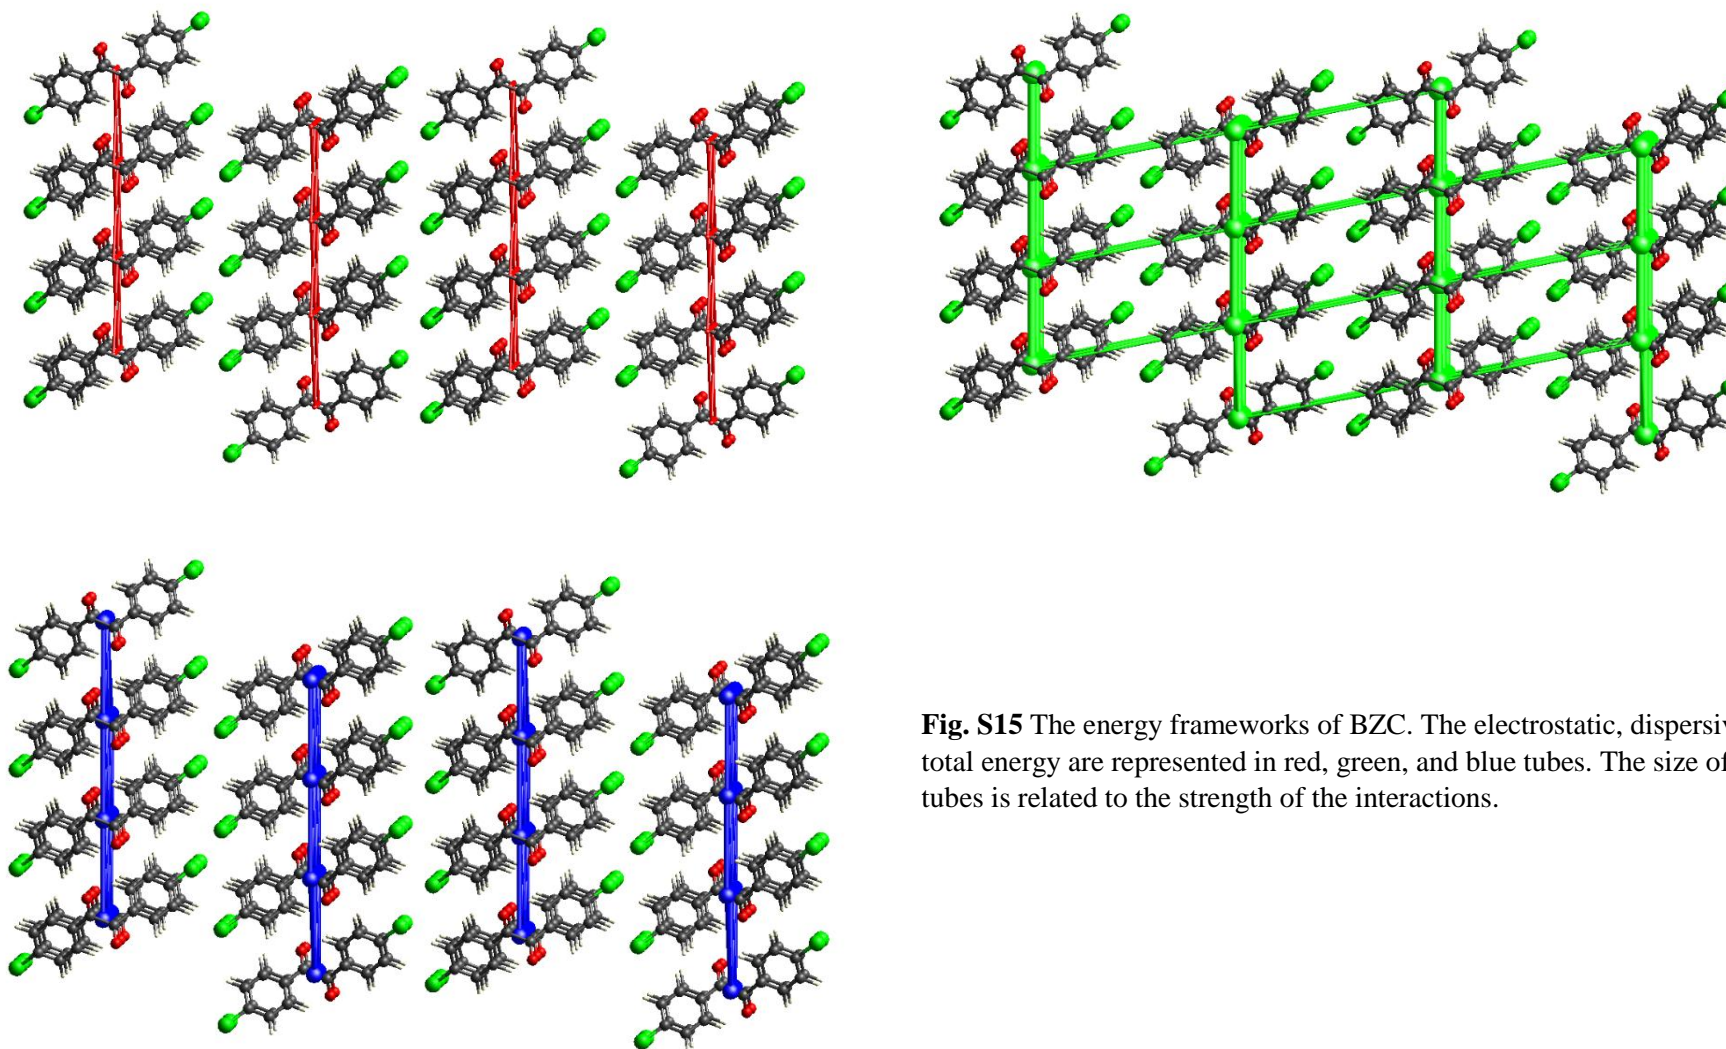

**Fig. S15** The energy frameworks of BZC. The electrostatic, dispersive, and total energy are represented in red, green, and blue tubes. The size of the tubes is related to the strength of the interactions.

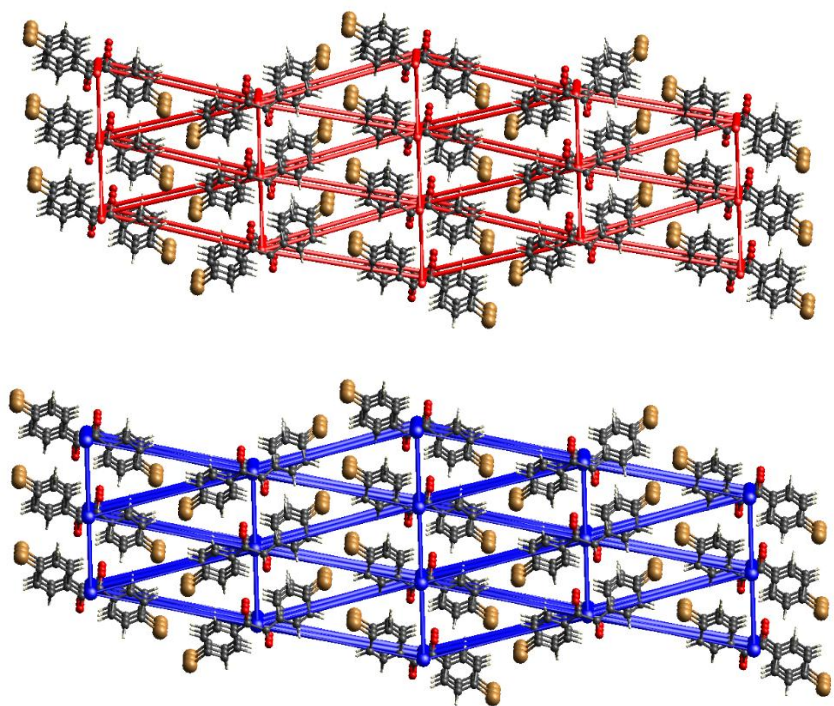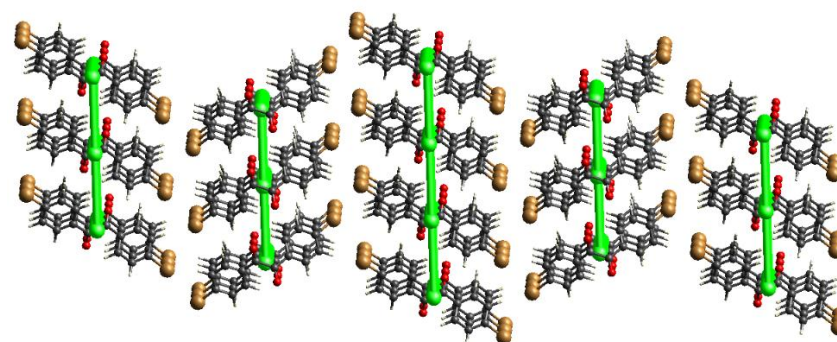

**Fig. S16** The energy frameworks of BZB. The electrostatic, dispersive, and total energy are represented in red, green, and blue tubes. The size of the tubes is related to the strength of the interactions.

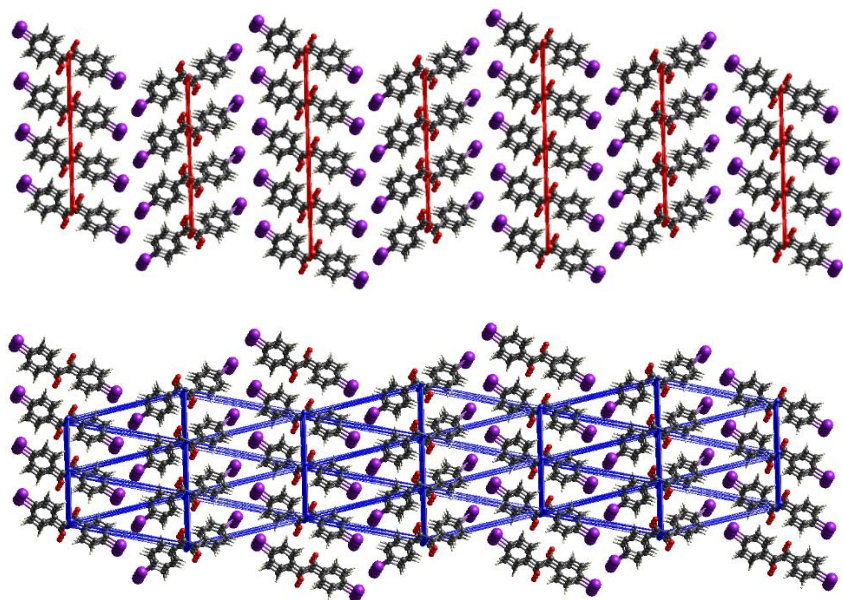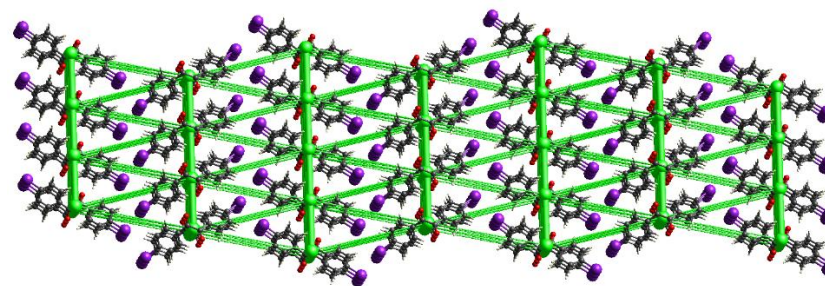

**Fig. S17** The energy frameworks of BZI. The electrostatic, dispersive, and total energy are represented in red, green, and blue tubes. The size of the tubes is related to the strength of the interactions.

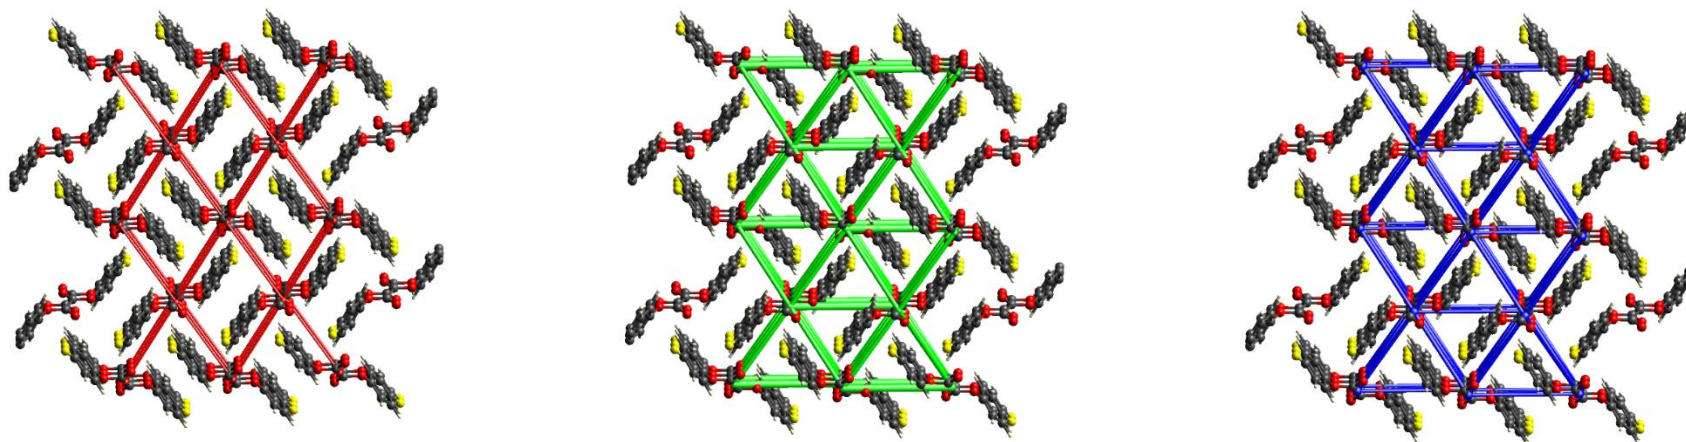

**Fig. S18** The energy frameworks of OXF. The electrostatic, dispersive, and total energy are represented in red, green, and blue tubes. The size of the tubes is related to the strength of the interactions.

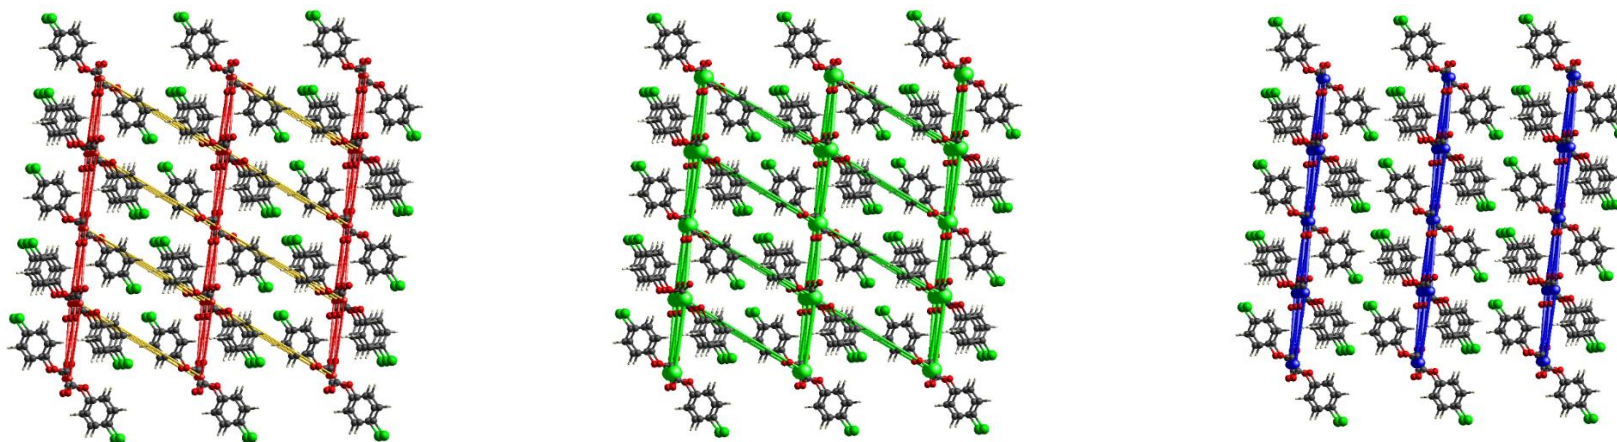

**Fig. S19** The energy frameworks of OXC.



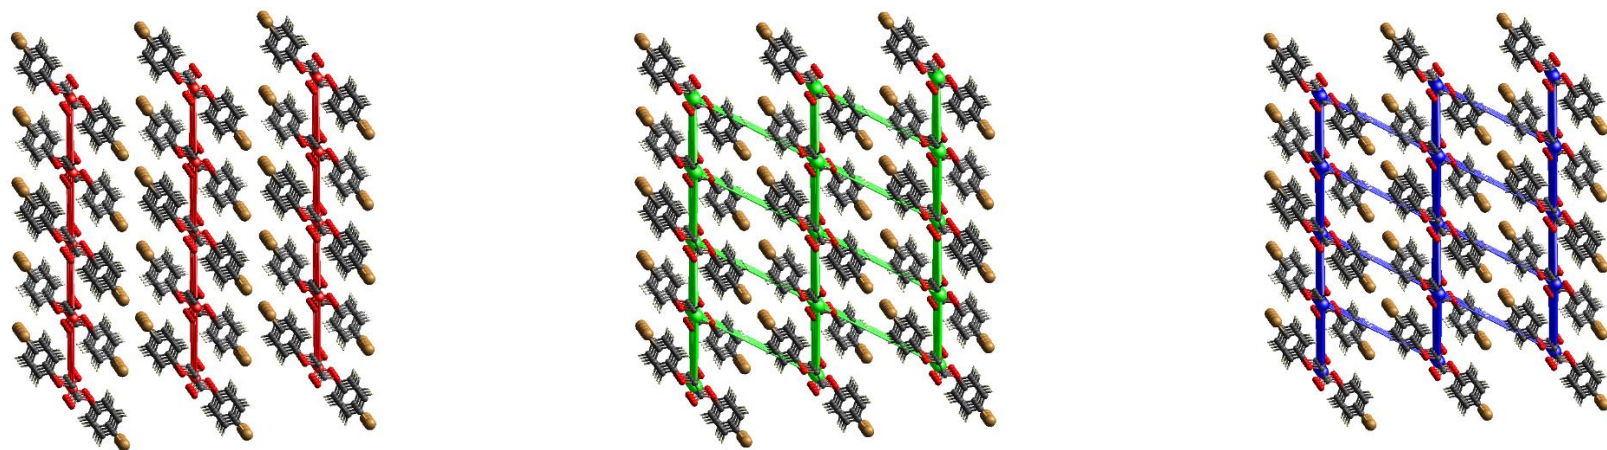

**Fig. S20** The energy frameworks of OXB.

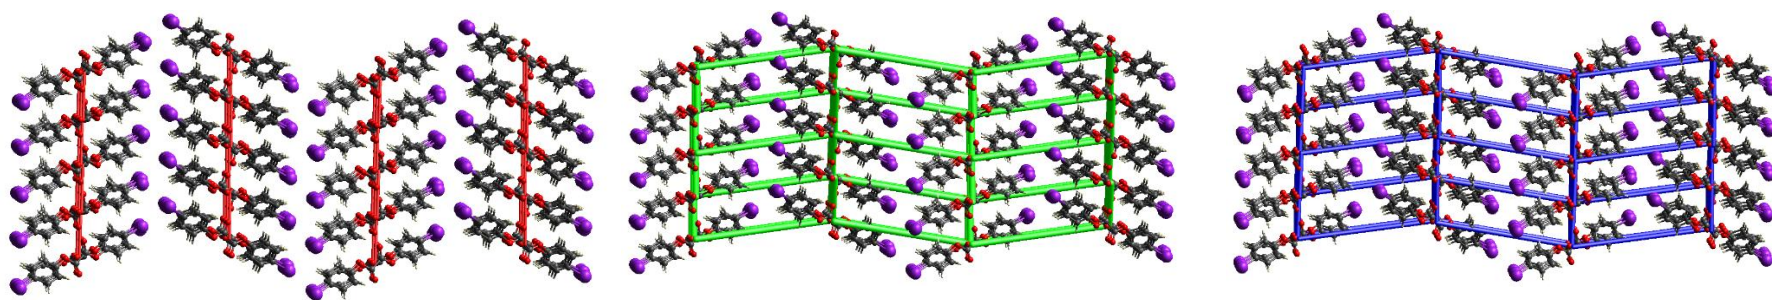

**Fig. S21** The energy frameworks of OXI.

**Table S7. Calculated normalized contacts ( $N_c$ ) values of the halogen interactions in the interlayer region**

| <b>Compound</b> | <b><math>d</math></b> | <b><math>V_r</math></b> | <b><math>N_c</math></b> |
|-----------------|-----------------------|-------------------------|-------------------------|
| BZF             |                       | 2.94                    |                         |
| BZC             | 3.366                 | 3.5                     | 0.961714                |
| BZB             | 3.845                 | 3.7                     | 1.039189                |
| BZI             | 3.96                  | 3.96                    | 1                       |
| OXC             | 3.587                 | 3.5                     | 1.024857                |
| OXB             | 3.51                  | 3.7                     | 0.948649                |
| OXI             | 4.037                 | 3.96                    | 1.019444                |

$d$  = bond distance;  $V_r$  = sum of van der Waals radii;  $N_c$  = normalized contacts

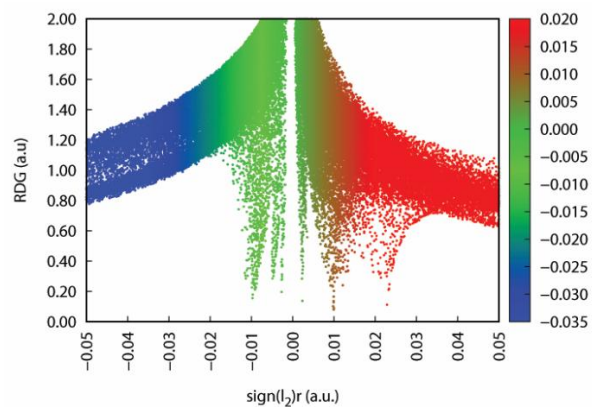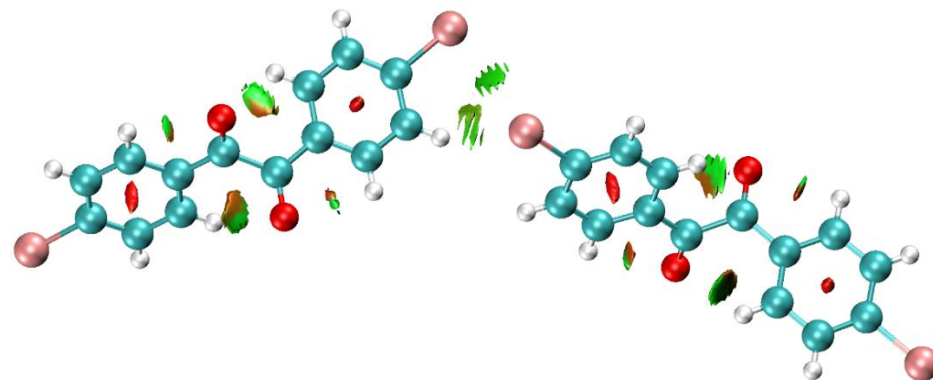

**Fig. S22** The RDG plot of BZB. The scatter plot of the RDG versus the electron density multiplied by the sign of the second Hessian eigenvalue( $\lambda_2$ ) and the RDG isosurface of the nearest interacting molecules in the interlayer region with the differences in the interactions that resembles in the scatter plot.

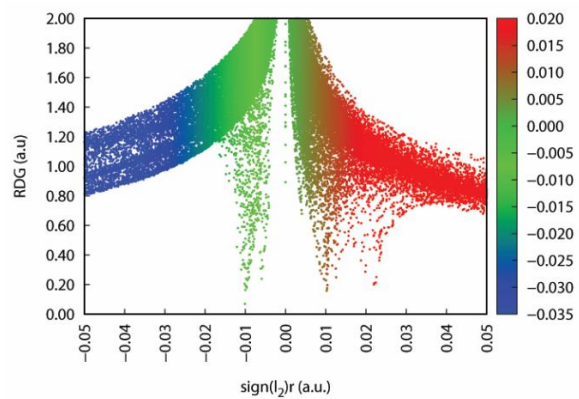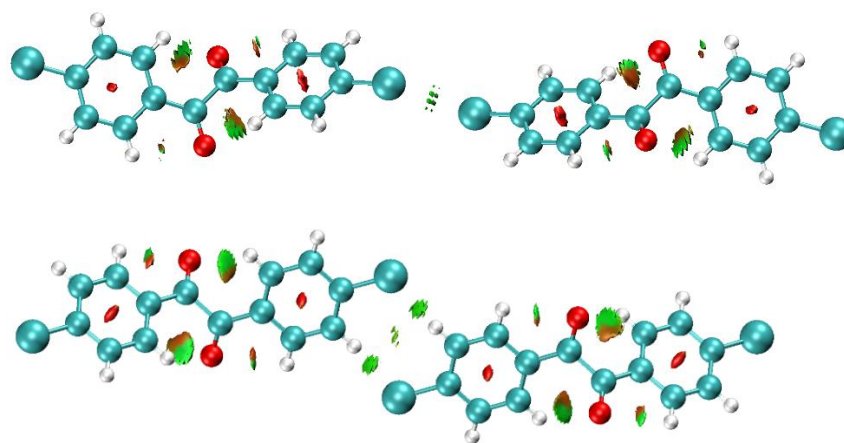

**Fig. S23** The RDG plot of BZC.

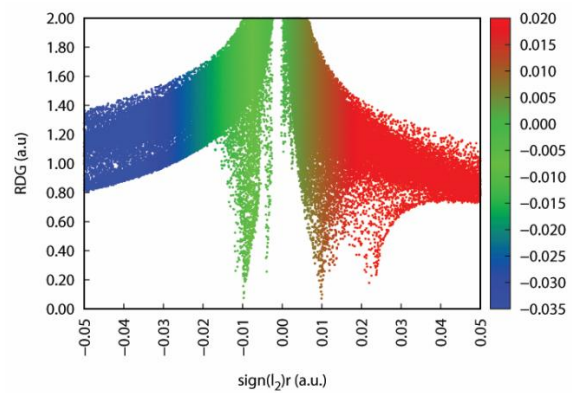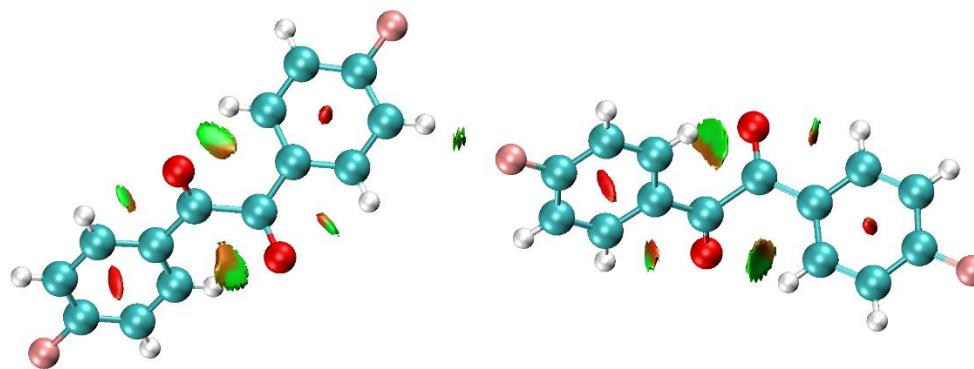

**Fig. S24** The RDG plot of BZF.

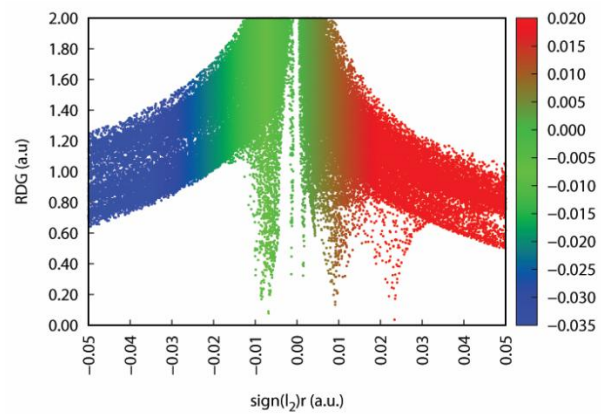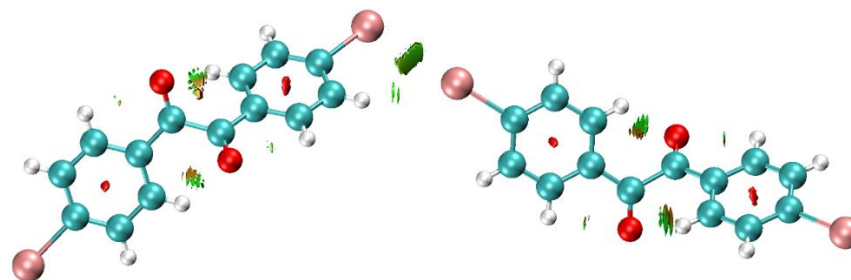

**Fig. S25** The RDG plot of BZI.

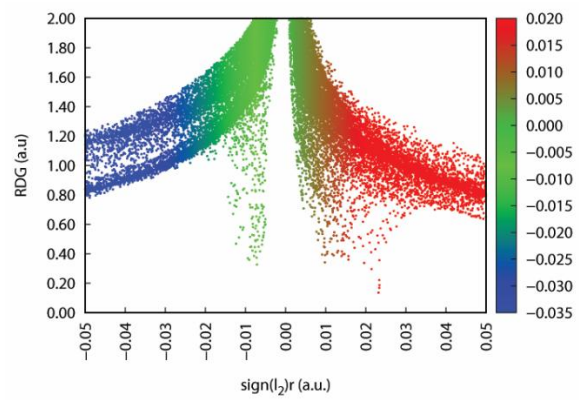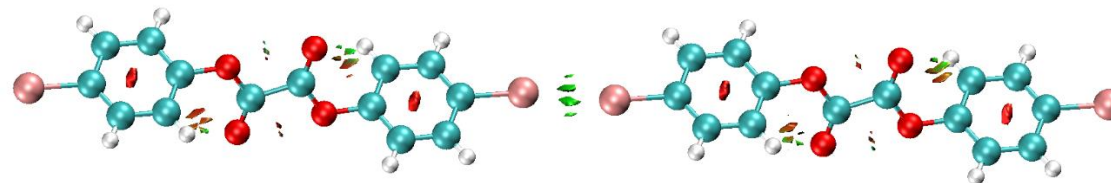

**Fig. S26** The RDG plot of OXB.

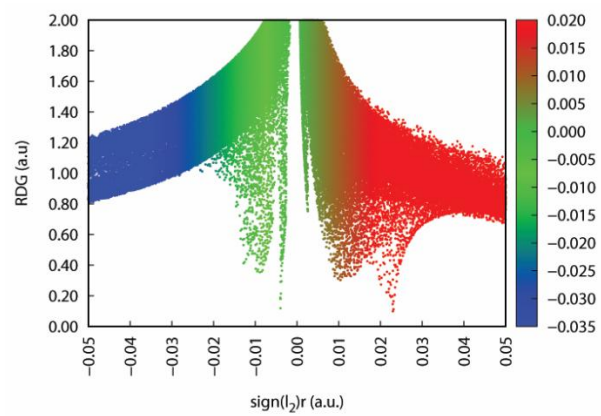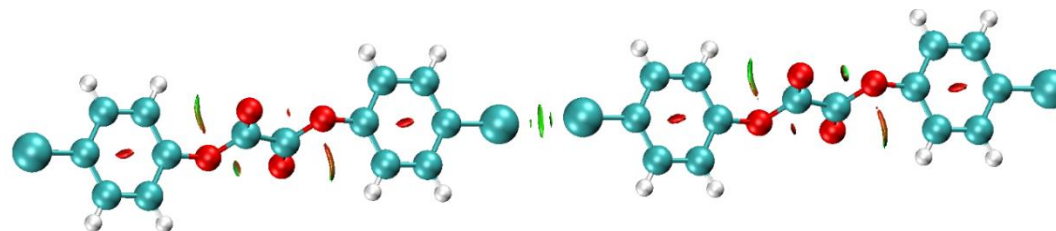

**Fig. S27** The RDG plot of OXC.

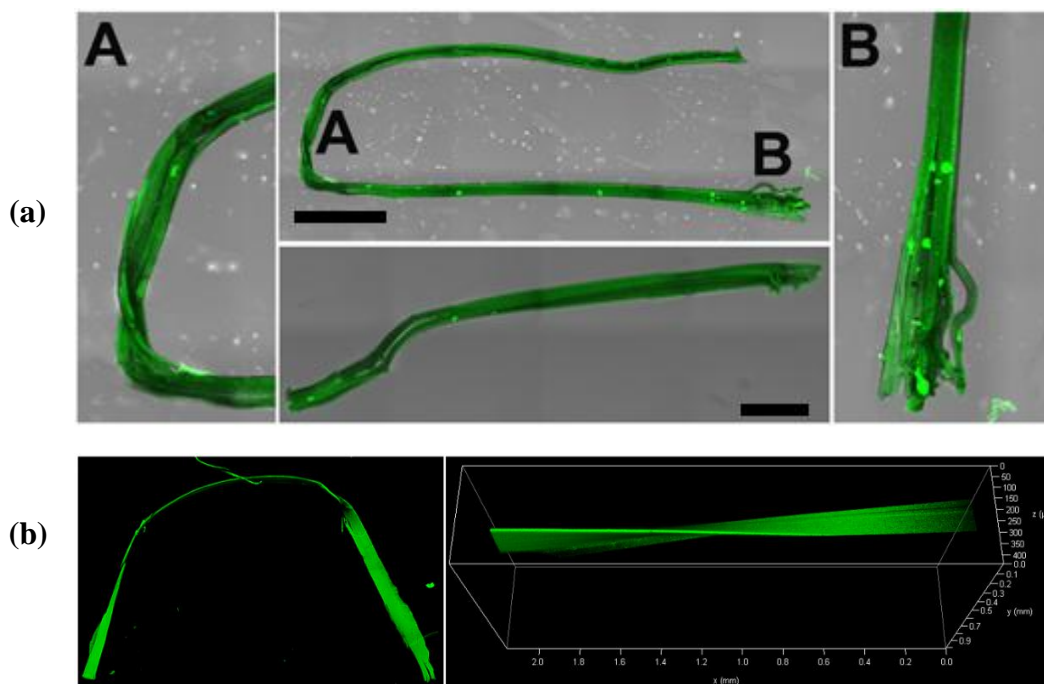

**Fig. S28** The confocal microscopy images. (a) the bent crystal of BZC. Note the delamination observed in the area corresponding to the ends and the bent region (the scale corresponds to 1 mm). (b) The bending and twisting are observed in BZF.

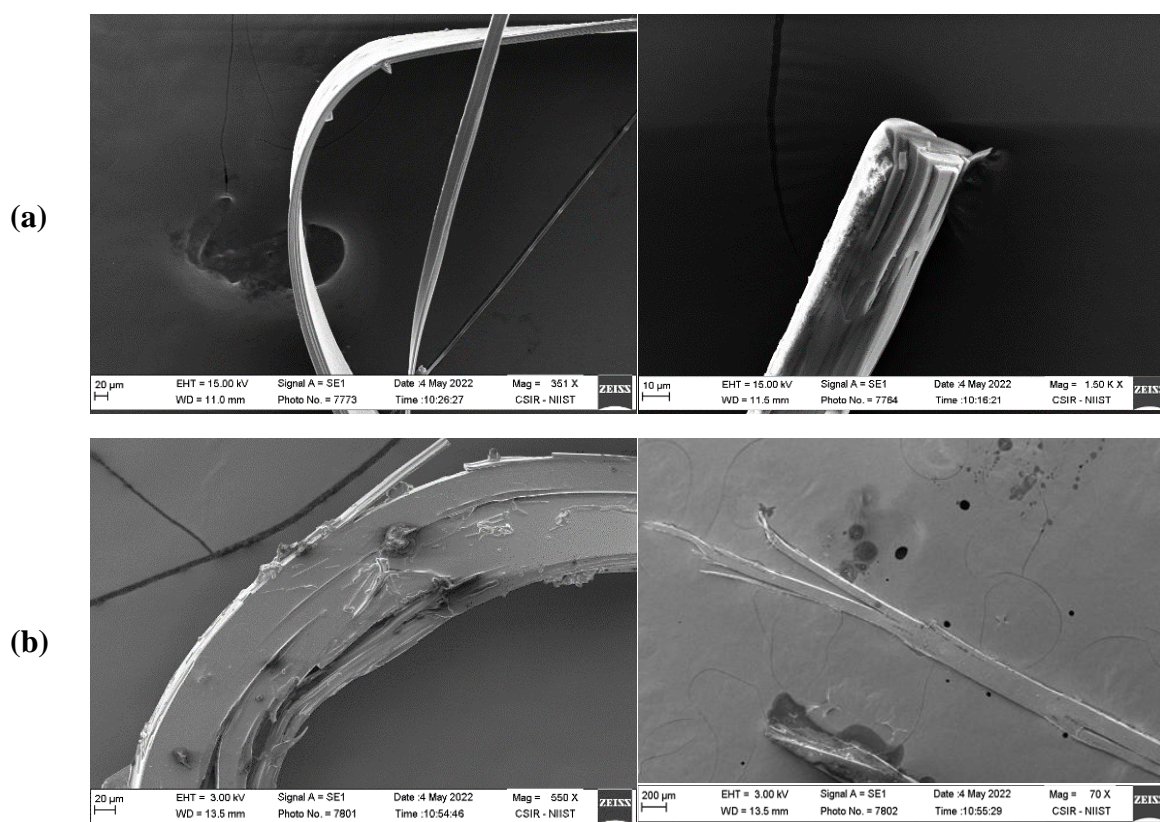

**Fig. S29** Scanning Electron Microscopy images. (a) The bent portion and the tip of BZC crystal. (b) The bent portion and tip of OXC crystal.

## Diffraction experiments on the bent crystals

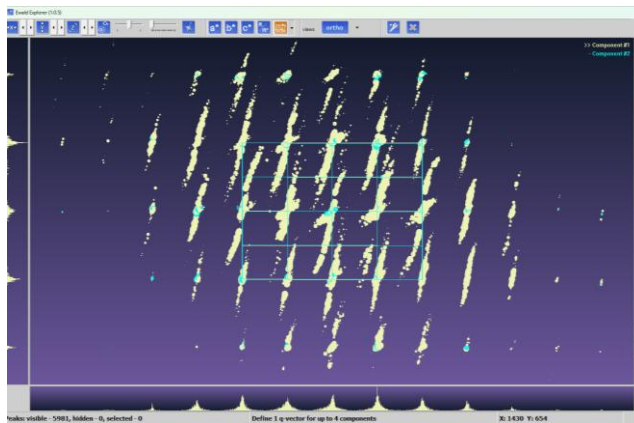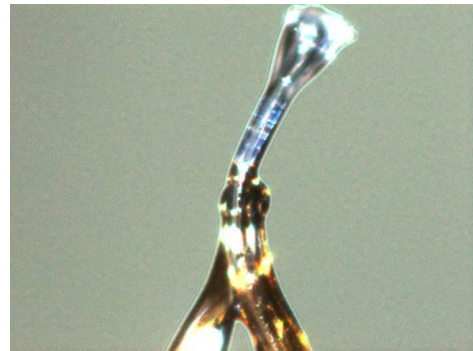

**Fig. S30** The diffraction patterns obtained from BZB.

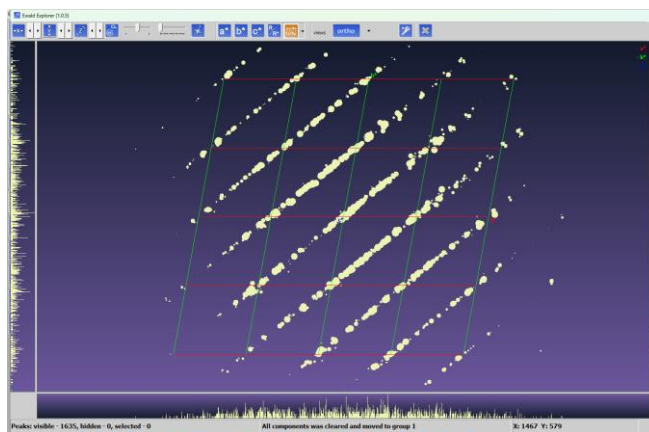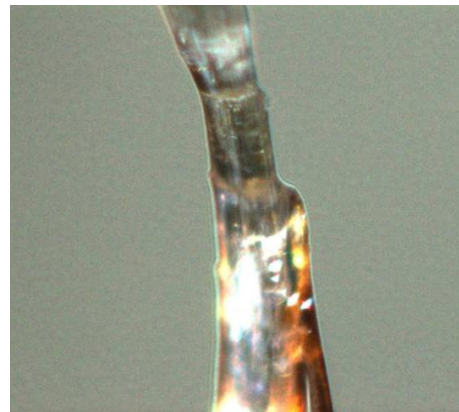

**Fig. S31** The diffraction patterns obtained from BZC.

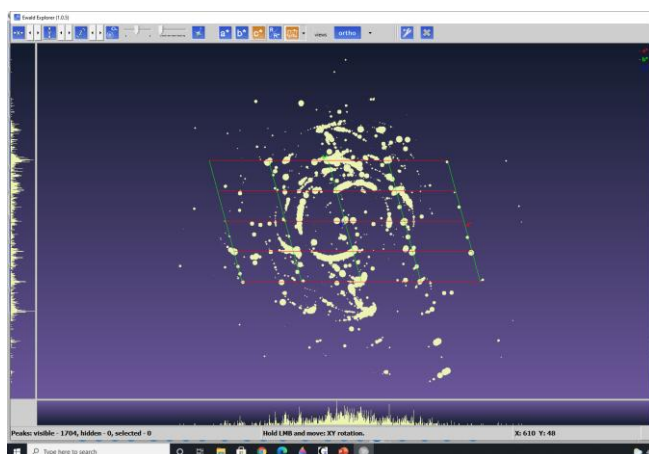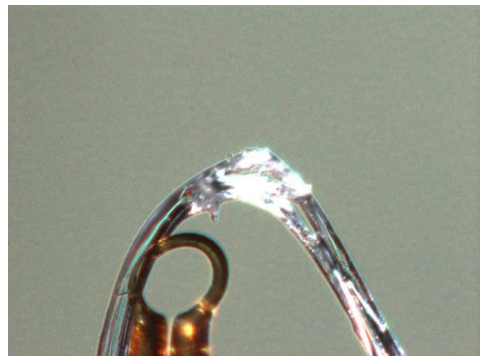

**Fig. S32** The diffraction patterns obtained from OXC.

## Absorption and Emission spectra of crystals

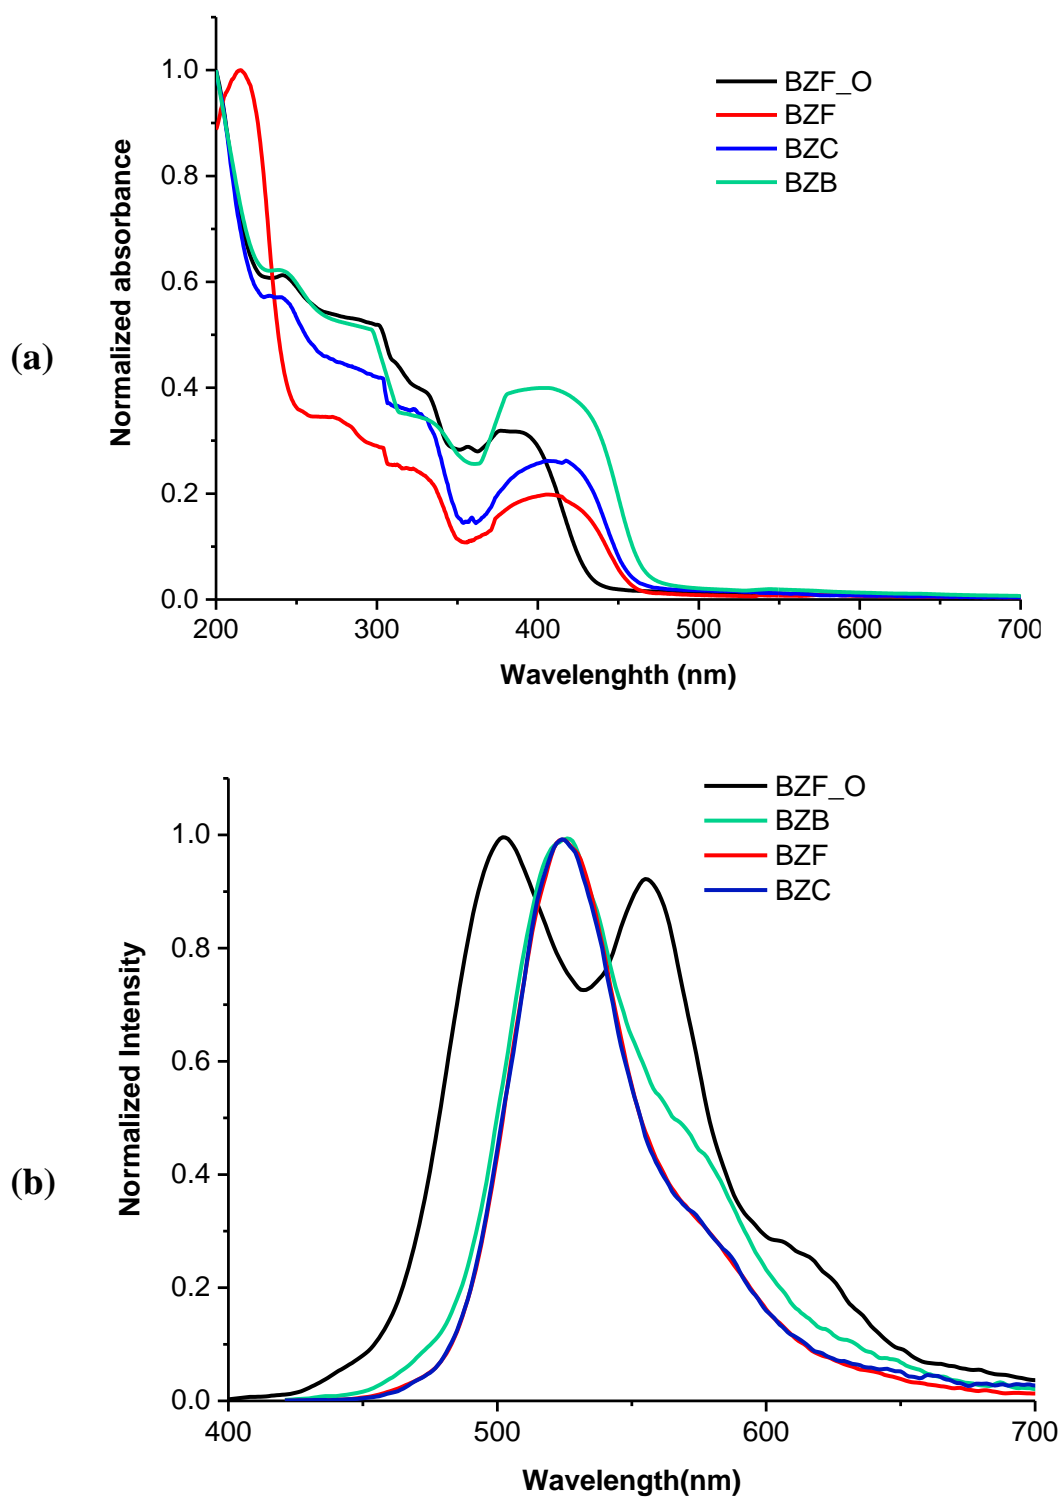

**Fig. S33** Absorption and emission spectra of solid crystalline samples of benzil compounds.
